# Calcineurin associates with centrosomes and regulates cilia length maintenance.

Eirini Tsekitsidou<sup>1</sup>, Jennifer T. Wang<sup>1,#</sup>, Cassandra J. Wong<sup>2</sup>, Idil Ulengin-Talkish<sup>1,^</sup>, Tim Stearns<sup>1,3</sup>, Anne-Claude Gingras<sup>2,4</sup>, Martha S. Cyert<sup>1, ‡</sup>

1. Department of Biology, Stanford University, Stanford, California 94305.
2. Lunenfeld-Tanenbaum Research Institute, Mount Sinai Hospital, Toronto, ON M5G 1X5, Canada.
3. Department of Genetics, Stanford School of Medicine, Stanford, California 94305.
4. Department of Molecular Genetics, University of Toronto, Toronto, ON M5S 1A8, Canada.

#Present address: Department of Biology, Washington University in St. Louis, St. Louis, Missouri 63130

^Present address: ORIC Pharmaceuticals, South San Francisco, California 94080.

‡ Corresponding author: *E-mail address:* [mcvert@stanford.edu](mailto:mcvert@stanford.edu)

## Summary statement

Calcineurin phosphatase participates in centrosome and cilia regulation. Calcineurin localizes to centrosomes, where it interacts with partner POC5, and its inhibition promotes cilia elongation.

## 1 **Abstract**

2  
3 Calcineurin, or PP2B, the  $\text{Ca}^{2+}$  and calmodulin-activated phosphatase and target of  
4 immunosuppressants, has many substrates and functions that remain undiscovered. By  
5 combining rapid proximity-dependent labeling with cell cycle synchronization, we  
6 mapped calcineurin's spatial distribution in different cell cycle stages. While calcineurin-  
7 proximal proteins did not vary significantly between interphase and mitosis, calcineurin  
8 consistently associated with multiple centrosomal/ciliary proteins. These include POC5,  
9 which binds centrin in a  $\text{Ca}^{2+}$ -dependent manner and is a component of the luminal  
10 scaffold that stabilizes centrioles. We show that POC5 contains a calcineurin substrate  
11 motif (PxIxIT-type) that mediates calcineurin binding *in vivo* and *in vitro*. Using indirect  
12 immunofluorescence and expansion microscopy, we demonstrate that calcineurin co-  
13 localizes with POC5 at the centrosome, and further show that calcineurin inhibitors alter  
14 POC5 distribution within the centriole lumen. Our discovery that calcineurin directly  
15 associates with centrosomal proteins highlights a role for  $\text{Ca}^{2+}$  and calcineurin signaling  
16 at these organelles. Calcineurin inhibition promotes primary cilia elongation without  
17 affecting ciliogenesis. Thus,  $\text{Ca}^{2+}$  signaling within cilia includes previously unknown  
18 functions for calcineurin in cilia length maintenance, a process frequently disrupted in  
19 ciliopathies.

20

21 **Key words:** calcineurin, phosphatase, POC5, cilia, centrosome, centriole

22

## 23 **Introduction**

24

25 In cells, calcium signaling is spatially controlled through colocalization of calcium ions  
26 ( $\text{Ca}^{2+}$ ) with their effector proteins within microdomains, allowing  $\text{Ca}^{2+}$  signals of different  
27 origins to direct distinct downstream events (Berridge et al., 2003). One such effector is  
28 calcineurin (CN, also known as protein phosphatase 2B or PP2B), the sole  
29  $\text{Ca}^{2+}$ /calmodulin (CaM) regulated serine/threonine protein phosphatase in animals. CN  
30 activates the adaptive immune response by dephosphorylating NFAT (nuclear factor of  
31 activated T-cells) transcription factors in T-cells, and CN inhibitors (CNIs)

32 FK506/tacrolimus and cyclosporin A (CysA), are used clinically as immunosuppressants  
33 (Rusnak and Mertz, 2000). However, CN is ubiquitously expressed, and has  
34 demonstrated roles in the cardiovascular and nervous systems. Thus CNIs also cause a  
35 broad range of adverse effects, especially in the kidney, whose etiologies are largely  
36 unknown (Azzi et al., 2013; Farouk and Rein, 2020). This underscores the need to  
37 elucidate CN signaling throughout the body, and to understand its targeting to different  
38 subcellular locations.

39 CN is an obligate heterodimer composed of a regulatory (CNB) and catalytic  
40 (CNA) subunit, which is inactive until  $\text{Ca}^{2+}/\text{CaM}$  binds to CNA and relieves autoinhibition  
41 (Li et al., 2016; Rusnak and Mertz, 2000). CN recognizes substrates via two **S**hort  
42 **L**inear peptide **M**otifs, or SLiMs, i.e. degenerate 3- to 10-aa sequences found within  
43 intrinsically disordered domains, that mediate low affinity, dynamic protein-protein  
44 interactions during signaling (Tompa et al., 2014). The CN-binding SLiMs, PxlIT and  
45 LxVP, have distinct properties: LxVP motifs bind to a pocket that is accessible only in  
46 the activated enzyme and is targeted by CNIs to block substrate dephosphorylation  
47 (Grigoriu et al., 2013; Roy and Cyert, 2020). In contrast, PxlIT motifs bind directly to  
48 CNA independently of its activation state and determine CN's intracellular distribution  
49 via anchoring to substrates, regulators and scaffolds (Roy and Cyert, 2020).

50 CN-specific SLiMs have been leveraged to systematically decode CN signaling.  
51 *In silico* identification of PxlIT and LxVP motifs revealed hundreds of putative  
52 substrates in humans (Brauer et al., 2019; Sheftic et al., 2016; Wigington et al., 2020).  
53 Experimentally, weak affinity SLiM-dependent CN interactions have been captured  
54 using proximity-dependent biotinylation coupled to mass spectrometry (PDB-MS)  
55 (Ulengin-Talkish et al., 2021; Wigington et al., 2020). Fusion of either WT or mutant  
56 CNAs (defective for PxlIT or LxVP binding) to the promiscuous biotin ligase, BirA\*,  
57 identified CN-proximal proteins. 50% of these were SLiM-dependent, i.e. showed  
58 reduced labeling with mutant CNs, and were enriched for computationally predicted CN-  
59 binding SLiMs. In humans, CN-proximal proteins map to multiple cellular compartments,  
60 which surprisingly include centrosomes, where its functions are unknown (Wigington et  
61 al., 2020).

62        Centrosomes serve as the cell's microtubule organizing center (MTOC), and are  
63 membrane-less organelles formed by two centrioles associated with pericentriolar  
64 material (PCM). The centrosome nucleates microtubules both in interphase and in  
65 mitosis, when duplicated centrosomes form the poles of the mitotic spindle (Wang and  
66 Stearns, 2017). In most cells that are not actively proliferating, centrioles transform into  
67 basal bodies which direct formation of the primary cilium, a non-motile appendage that  
68 extends into the extracellular space and functions as the cell's molecular antenna.  
69 (Avasthi and Marshall, 2012; Wang and Stearns, 2017). Primary cilia serve as  
70 specialized sites for Hedgehog and Ca<sup>2+</sup> signaling, and when disrupted, lead to a group  
71 of disorders known as ciliopathies (Delling et al., 2013; Hildebrandt et al., 2011).

72        Here, we further investigate the association of CN with centrosomes and cilia by  
73 mapping CN-proximal proteins using miniTurbo, a fast-acting biotin ligase whose short  
74 labelling time allowed us to probe CN's subcellular distribution across the cell cycle.  
75 (Branon et al., 2018). We find that CN-proximal proteins do not change dramatically  
76 between interphase and mitosis, but are significantly enriched at centrosomes and  
77 centrioles, including POC5 (proteome of centriole 5), which we demonstrate to bind CN  
78 via a PxlIT motif. We show that a pool of CN colocalizes with POC5 at centrosomes,  
79 and that CNs alter POC5 distribution within the centriole. Finally, we demonstrate that  
80 CN inhibition promotes primary cilia elongation without affecting ciliogenesis. Together,  
81 our findings establish that CN associates directly with centrosomal components and  
82 regulates cilia length, a process frequently disrupted in ciliopathies.

83

## 84 **Results and Discussion**

85

### 86 **Proximity labeling maps CN's subcellular distribution across the cell cycle**

87

88        To map CN's subcellular neighborhoods across the cell cycle, CNA $\alpha$  was fused  
89 to miniTurbo, a promiscuous biotin ligase that labels proteins within a ~10nm radius in  
90 15 minutes (Branon et al., 2018; Gingras et al., 2019). HEK293 T-REx cells expressing  
91 miniTurbo-3xFLAG alone or fused to -CNA $\alpha$ <sub>WT</sub> or -CNA $\alpha$ <sub>NIRmut</sub>, a mutant with impaired  
92 PxlIT-docking (Li et al., 2007), were incubated with biotin using populations that were

93 either asynchronous, or synchronized in G1/S (released from double thymidine block) or  
94 mitosis (released from arrest with Cdk1 inhibitor RO-3306) (Fig. 1A). MiniTurbo-CNA  
95 expression did not alter cell cycle progression, and cell synchrony and miniTurbo  
96 expression levels were evaluated for each sample (Figs S1A-E).

97 Biotinylated proteins were then identified via mass spectrometry (MS) using both  
98 data-dependent (DDA) and data-independent acquisition (DIA/mSPLIT) which yielded  
99 41 CN-proximal proteins that were significantly biotinylated by  $\text{CNA}\alpha_{\text{WT}} (\geq 2$  unique  
100 peptides and bayesian false discovery rate,  $\text{BFDR} \leq 0.01$ ) in at least one condition (38  
101 from DDA and 3 additional from mSPLIT- Figs 1B, S1F and Table S1). These proteins  
102 are enriched for protein-protein interactions (PPI enrichment p-value =  $4.02\text{e-}05$ , Fig.  
103 S1G) and include several known CN interactors and substrates: AKAP5 (Dell'Acqua et  
104 al., 2002), PI4KA and FAM126A (Ulengin-Talkish et al., 2021), PHKA1 (Ingebritsen and  
105 Cohen, 1983) and RCAN1 (Mehta et al., 2009). The majority of CN-proximal proteins  
106 were PxlIT-dependent (35/41,  $\text{Log}_2$  spectral counts with  $\text{CNA}\alpha_{\text{WT}}/\text{CNA}\alpha_{\text{NIRmut}} \geq 0.5$  for  
107 at least one condition), and 17 of these contained a predicted CN-specific SLiM (Figs  
108 1B, S1F and Table S1). Fewer CN-proximal proteins were identified compared to  
109 previous studies with BirA\* (Wigington et al., 2020), likely due to the much shorter  
110 labeling time (15 minutes versus 18 hours). However, 15 proteins were common to both  
111 datasets (Table S1).

112 Notably, the most robustly detected CN-proximal proteins were common to  
113 asynchronous, G1/S and mitotic populations (23/41 preys). Proteins that were detected  
114 only in M (4/41) or G1/S (3/41) samples were generally not known to be associated with  
115 cell-cycle-specific functions and were represented by relatively few spectral counts ( $\leq 7$ ),  
116 suggesting that they may be at the limit of detection. Together, these observations  
117 suggest that CN spatial distribution is relatively constant throughout the cell cycle and  
118 that any changes in CN signaling are dictated instead by temporal regulation of  $\text{Ca}^{2+}$   
119 signals.

120

121 **CN is proximal to centrosomal components in a cell cycle independent manner**

122

123 Interestingly, CN-proximal proteins identified here were significantly enriched in  
124 gene ontology terms associated with the microtubule cytoskeleton, centrosomes and  
125 specifically centrioles, with the reactome pathway “cilium assembly” also being enriched  
126 (FDR 0.044) (Mi et al., 2013) (Figs 1B, C, Table S1). Furthermore, by manually curating  
127 the literature we found 14 CN-proximal proteins that spatially distribute throughout the  
128 centrosome and cilium and/or localize to the mitotic spindle (Fig. 1D and Table S2).  
129 Nine of these were identified previously (Fig. 1E).

130 Overall, these results suggest that CN contacts centrosomal proteins, either at  
131 the centrosome or before they are incorporated into centrosomes. In addition, CN  
132 proximity to mitotic spindle proteins suggests possible undiscovered functions for CN at  
133 spindle microtubules or poles during mitosis, when centrosomal  $\text{Ca}^{2+}$  signals have been  
134 observed (Helassa et al., 2019).

135

### 136 **CN regulatory subunit CNB localizes to the centrosome**

137 Our evidence of CN proximity to centrosomal/ciliary proteins spurred us to  
138 examine whether a pool of CN exists at these organelles. Initial attempts to visualize  
139 CNB (which is always found in association with CNA) via indirect immunofluorescence  
140 of hTERT-RPE1 showed diffuse cytoplasmic distribution.

141 However, by permeabilizing cells with digitonin treatment prior to fixation (Sydor  
142 et al., 2018), we were able to detect CNB localization at centrioles and the pericentriolar  
143 region of centrosomes (Fig. 2A). Specifically, CNB was observed either surrounding  
144 centrioles (63.9% of cells) or distributed in between mother and daughter centrioles  
145 (25.3% of cells), with only 10.8% of cells showing no centriole-associated CNB.  
146 Furthermore, this staining was specific, as centrosomal localization was eliminated by  
147 preincubating the anti-CNB antisera with purified CNB protein, but not with bovine  
148 serum albumin (Figs S2A, B).

149 To examine the centrosomal localization of CNB in more detail, we performed  
150 ultrastructure expansion microscopy (U-ExM) (Gambarotto et al., 2019), in hTERT-  
151 RPE1 cells using the same anti-CNB antiserum used in Fig. 2A. Anti-polyglutamylated  
152 tubulin identified the microtubule barrel and anti-POC5 marked the lumen. Despite the  
153 presence of cytoplasmic CNB, which increased the background signal, some CNB could

154 be seen to co-localize with tubulin at the centriole barrel (Fig. 2B). No CNB staining was  
155 observed at primary cilia in hTERT-RPE1 cells (data not shown).

156 Our results provide the first evidence that a pool of CN specifically localizes to  
157 centrosomes, where it may interact directly with centrosomal proteins.

158

### 159 **CN interacts with centriolar protein POC5 in a PxlIT-dependent manner**

160

161 To identify CN binding partners at the centrosome, we focused on POC5, which  
162 showed PxlIT-dependent biotinylation by miniTurbo-CNA $\alpha$  under all conditions (Fig.  
163 1B, Table S1) and contains a predicted PxlIT motif (Fig. 3A) (Wigington et al., 2020).  
164 POC5 is required for centriole maturation and ciliogenesis, and forms a scaffold in the  
165 centriole lumen by binding to centrin, POC1B and FAM161A, to stabilize the  
166 microtubule barrel (Azimzadeh et al., 2009; Le Guennec et al., 2020). Mutations in  
167 POC5 cause adolescent idiopathic scoliosis (Hassan et al., 2019) and retinitis  
168 pigmentosa (Weisz Hubshman et al., 2018).

169 To investigate whether CN recognizes POC5's predicted PxlIT motif  
170 <sup>57</sup>PDVRIS<sup>68</sup> (Fig. 3A), we fused WT and mutant POC5 peptides to glutathione S-  
171 transferase (GST) and tested their co-purification with 6xHis-CNA $\alpha$ <sub>WT</sub>/CNB, or 6xHis-  
172 CNA $\alpha$ <sub>NIRmut</sub>/CNB *in vitro*. CN<sub>WT</sub> co-purified with the POC5 WT peptide (PDVRIS) and  
173 more robustly with a known PxlIT peptide from NFATC1 (PRIET), but not with GST  
174 alone. Co-purification of CN<sub>WT</sub> was significantly reduced with mutant POC5 peptide  
175 ADARAA, and CN<sub>NIRmut</sub> co-purified weakly with all peptides (Figs 3B, C) consistent with  
176 PxlIT-mediated binding.

177 To examine CN interaction with full-length POC5, we transiently expressed GFP-  
178 CNA $\alpha$ <sub>WT</sub> or GFP-Flag in HEK293T cells together with 6xmyc-POC5<sub>WT</sub> and -POC5<sub>ADARAA</sub>  
179 and measured the amount of CN that co-immunoprecipitated with POC5. GFP-CNA $\alpha$ <sub>WT</sub>  
180 (but not GFP-FLAG) co-immunoprecipitated with POC5<sub>WT</sub> and showed reduced  
181 interaction with POC5<sub>ADARAA</sub> (Figs 3D, E), indicating that full-length POC5 binds directly  
182 to CN through its identified PxlIT motif.

183 Next, we sought to identify a functional role for POC5 binding to CN. To  
184 determine whether the POC5 PxlIT motif is required for its localization to centrioles, we

185 carried out indirect immunofluorescence of HeLa cells transiently expressing 6xmyc-  
186 POC5 (POC5<sub>WT</sub> or mutated PxlXIT POC5<sub>ADARAA</sub>). Both proteins co-localized with centrin  
187 at centrioles in G1 and at spindle poles in mitosis (Fig. 3F), and preferentially localized  
188 to one centriole, presumably the mother, as described (Azimzadeh et al., 2009).  
189 Furthermore, centriole numbers were unaffected in POC5<sub>ADARAA</sub> and POC5<sub>WT</sub> -  
190 expressing cells (data not shown). Although no CN-dependence was revealed by these  
191 analyses, we reasoned that this qualitative determination of POC5 localization under  
192 overexpressing conditions might not be sufficiently sensitive to detect CN-dependent  
193 regulation of POC5 at centrioles.

194 Therefore, we used U-ExM to more precisely examine the distribution of  
195 endogenously expressed POC5, as well as  $\gamma$ -tubulin, in the centriolar lumen under both  
196 control (DMSO) and CN-inhibited (FK506) conditions. POC5 is required for  $\gamma$ -tubulin  
197 localization to the centriole lumen, but not to the PCM (Schweizer et al., 2021). Cells  
198 were imaged using antisera against POC5,  $\gamma$ -tubulin, and acetylated tubulin, which  
199 marks the centriole barrel. We found that POC5 coverage of the centriole lumen was  
200 significantly reduced in centrioles from CN-inhibited compared to control cells (Figs 3G-  
201 I, S3A). Thus, CN activity may modify POC5 association with or distribution within the  
202 centriole lumen, while not disrupting its ability to recruit  $\gamma$ -tubulin.

203 Together, these findings show that CN interacts directly with POC5 via a PxlXIT  
204 motif, and that CN activity affects POC5 distribution at the centriole lumen. However,  
205 further analyses are required to determine if CN binding to POC5 is required proper  
206 POC5 distribution and/or for CN localization to centrosomes.

207

## 208 **CN dephosphorylates POC5 *in vitro***

209

210 We hypothesized that CN activity modifies POC5 distribution by regulating its  
211 phosphorylation and set out to test whether POC5 is a CN substrate. POC5 is  
212 phosphorylated on several serine residues (Fig. 3A), although the functional  
213 significance of these modifications is unknown. POC5 is phosphorylated in mitosis  
214 (Azimzadeh et al., 2009); thus, 6xmyc-POC5<sub>WT</sub> was immunopurified from nocodazole-  
215 synchronized, mitotic HeLa cells and incubated *in vitro* with either constitutively active,



216 truncated 6xHis-CNA $\alpha_{WT}$ /CNB missing the autoinhibitory tail, or the non-specific  $\lambda$   
217 phosphatase. POC5 phosphorylation was assessed by visualizing electrophoretic  
218 mobility shifts via immunoblotting. POC5 appeared as a doublet with the slower  
219 migrating band corresponding to phosphorylated POC5 (p-POC5, Fig. 3J, Input).  
220 Treatment with either CN or  $\lambda$  phosphatase eliminated the p-POC5 band, which was  
221 preserved by the addition of phosphatase inhibitors (Fig. 3J). Thus, CN  
222 dephosphorylates mitotic POC5 *in vitro*.

223 However, in extracts of mitotic cells expressing 6xmyc-POC5 $_{WT}$  or -POC5 $_{ADARAA}$ ,  
224 neither CN activation (ionomycin + Ca $^{2+}$ ), nor inhibition (FK506) altered POC5  
225 electrophoretic migration (Fig. S3B). POC5 is also hyperphosphorylated in  
226 nuclear/centrosomal fractions isolated from asynchronous cell cultures (Azimzadeh et  
227 al., 2009), but this population of POC5 also failed to show either Ca $^{2+}$  or CN-dependent  
228 changes in electrophoretic mobility (Fig. 3SC). Thus, while CN dephosphorylates POC5  
229 *in vitro*, this activity has yet to be demonstrated *in vivo*.

230 Together, our analyses show that CN interacts directly with POC5 and regulates  
231 its distribution within the centriole lumen--possibly by dephosphorylating POC5. While  
232 we were unable to demonstrate CN-dependent regulation of POC5 phospho-status *in*  
233 *vivo*, these analyses await further information about the kinases that target POC5 and  
234 the timing and functional significance of these modifications.

235

### 236 **CN inhibition promotes primary cilia elongation**

237

238 Besides its role in centriole stabilization, POC5 is known to regulate ciliation.  
239 Both POC5 and CEP97 (another CN-proximal protein, Fig. 1B) are required for cilia  
240 assembly, maintenance, signaling and retraction (Hassan et al., 2019; Schweizer et al.,  
241 2021; Spektor et al., 2007) High affinity CN-binding partners CaM, FG-repeat  
242 nucleoporins and RCAN2 also localize to basal bodies and regulate ciliation (Kee et al.,  
243 2012; Plotnikova et al., 2012; Stevenson et al., 2018), suggesting possible CN-  
244 dependent modulation of these processes. To examine whether CN regulates ciliation,  
245 IMCD3 cells were grown to near confluency (~20% ciliated) (Figs 4A, B) and then plated  
246 at a high density to induce ciliation via contact inhibition (Joly et al., 2006), while

247 simultaneously treating them with DMSO (control) or the CNi FK506. After 48 hours,  
248 ~50% of either DMSO or FK506-treated cells displayed a cilium (Fig. 4B), indicating that  
249 CN activity is not required for ciliogenesis. However, we noticed that the cilia produced  
250 were significantly longer in CN-inhibited cells compared to control. Under control  
251 conditions, cilia length at 24 hours (median = 6.27  $\mu\text{m}$ ) was maintained over the next 24  
252 hours. In contrast, cilia were longer in CN-inhibited cells at 24 hours (median = 7.23  $\mu\text{m}$ )  
253 and continued to grow (48 hours, median = 8.59  $\mu\text{m}$ , Fig. 4C).

254 Previous studies show that  $\text{Ca}^{2+}$  and PKA signaling work antagonistically to  
255 acutely regulate ciliary length, and that adenylyl cyclase activation by forskolin, or  
256 inhibition of  $\text{Ca}^{2+}$  entry, both lengthen cilia by increasing cAMP levels and PKA activity  
257 (Besschetnova et al., 2010). To examine CN's role in maintaining cilia length, we  
258 treated confluent, ciliated IMCD3 cells with CysA or FK506 for 3 hours, which  
259 significantly lengthened cilia compared to the DMSO control (Figs 4D-E, 4SA).  
260 Elongation was even more dramatic with forskolin (Figs 4D-E, 4SA). However, none of  
261 these treatments altered the proportion of ciliated cells (Fig. 4F), suggesting that CN  
262 regulates mechanisms maintaining proper cilia length rather than cilium assembly.

263 In sum, our results reveal that CN localizes to centrosomes, and suggest that CN  
264 modifies one or more aspects of centriolar and ciliary homeostasis. Most prior research  
265 has focused on centrosome regulation by kinases, but our findings highlight a need to  
266 understand phosphatase and  $\text{Ca}^{2+}$  signaling at these organelles.  $\text{Ca}^{2+}$  signals have  
267 been observed at centrosomes (Helassa et al., 2019), where they activate downstream  
268 effectors like CaM (Plotnikova et al., 2012) and centrin. In fact, centrin requires  $\text{Ca}^{2+}$  to  
269 localize to centrosomes and to interact with the structural protein POC5 (Khouj et al.,  
270 2019). CN binds directly to POC5 through a PxlIT motif and alters POC5 distribution  
271 within the centriole, suggesting that it may directly regulate this protein despite our  
272 inability to detect CN-dependent changes in POC5 phosphorylation *in vivo*. POC5  
273 promotes ciliogenesis by recruiting the augmin complex and the  $\gamma$ -tubulin ring complex  
274 ( $\gamma$ -TuRC) to the centriole lumen (Hassan et al., 2019; Schweizer et al., 2021). Of the 8  
275 augmin complex subunits, HAUS5, HAUS6 and HAUS8 have all been identified as CN-  
276 proximal with two PxlIT motifs predicted within HAUS6 (Wigington et al., 2020). Thus,

277 the possibility that CN regulates POC5, augmin or other centriolar components to  
278 regulate centriolar stability and/or ciliary function warrants further investigation.

279 We also discovered that CN regulates cilia length, although the mechanism  
280 underlying this effect remains to be determined. Our findings are consistent with  
281 previous studies which localized RCAN2, a negative regulator of CN, to centrioles and  
282 basal bodies and showed that its depletion resulted in shorter cilia (Stevenson et al.,  
283 2018). CN may alter cilia length through effects on POC5 or other structural proteins.  
284 Alternatively, CN may mediate documented  $\text{Ca}^{2+}$ -dependent regulation of cAMP/ PKA  
285 signaling (Besschetnova et al., 2010), perhaps via binding to AKAP150/AKAP5, a  
286 scaffold for CN and PKA that localizes to primary cilia, centrosomes and mitotic  
287 spindles. In cilia, AKAP5 associates with adenylyl cyclases AC5/6 and the ciliary  $\text{Ca}^{2+}$   
288 channel polycystin-2 (PC2) (Choi et al., 2011). Remarkably, the CNA ortholog in  
289 *Caenorhabditis elegans*, Tax-6, targets PC2 to cilia (Hu et al., 2006), although this has  
290 not been investigated in mammals. Abnormal cilia length is a common phenotype of  
291 ciliopathies in highly ciliated organs, such as the kidney and retina (Moreno-Leon et al.,  
292 2021; Veland et al., 2009). Thus, elucidating the mechanisms by which CN regulates  
293 cilia length and centriolar function promises to improve our current understanding and  
294 treatment of ciliary disorders.

295

## 296 **Materials and methods**

297

### 298 **Cell lines and culture**

299 Cells were cultured at 37 °C in 5%  $\text{CO}_2$ . HEK293T, HeLa and mouse IMCD3 cells were  
300 grown in Dulbecco's Modification of Eagle's Medium (DMEM) with 4.5g/L glucose, L-  
301 glutamine, and sodium pyruvate (Corning, 10-013-CV) supplemented with 10% fetal  
302 bovine serum (FBS, Benchmark™, Gemini Bio Products, 100-106). HEK293T and HeLa  
303 cells were a gift from Jan Skotheim's lab at Stanford University. IMCD3 cells were a gift  
304 from Peter Jackson's lab at Stanford University. hTERT-RPE1 cells were cultured in  
305 DMEM/F12 media (Gibco™, 11320033) supplemented with 10% FBS. hTERT-RPE1  
306 cells were a gift from Tim Stearns' lab at Stanford University. Parental HEK293 Flp-In T-  
307 REx cells were provided by Anne-Claude Gingras, University of Toronto, and cultured in

308 DMEM supplemented with 10% FBS, 3 µg/mL blasticidin (Research Products  
309 International, B12150) and 100 µg/mL zeocin (Gibco™, R25001) prior to stable plasmid  
310 integration. Mycoplasma testing was conducted monthly using a mycoplasma PCR  
311 detection kit (ABM, G238). Human and mouse cell lines were authenticated by STR  
312 profiling (Almeida et al., 2019; Barallon et al., 2010). IMCD3 cells in particular were  
313 authenticated using the ATCC Mouse Cell Authentication Service (ATCC, 137-XV).  
314

### 315 **MiniTurbo-3xFLAG stable cell lines**

316 MiniTurbo-3xFLAG constructs were generated via Gateway cloning into pDEST 5'  
317 miniTurbo-3xFLAG pcDNA5 FRT TO. Stable cell lines were generated in HEK293 Flp-In  
318 T-REx cell pools as described previously for BirA\*-FLAG (Hesketh et al., 2017).  
319 Doxycycline-inducible, miniTurbo-expressing HEK293 Flp-In T-REx were cultured in  
320 antibiotic selection media: DMEM supplemented with 10% FBS, 3 µg/mL blasticidin and  
321 200 µg/mL hygromycin-B (Research Products International, H75000-1). MiniTurbo  
322 expression was induced with addition of 1 µg/mL doxycycline (Sigma-Aldrich, D9891)  
323 for 48 hours. During BioID assays, stable cell lines were cultured in DMEM  
324 supplemented with 10% FBS previously treated to remove residual biotin (method  
325 described below), in order to reduce the possibility of non-specific biotinylation.

326

### 327 **Plasmid transfection**

328 For stable cell line generation, HEK293 Flp-In T-Rex cells were co-transfected with  
329 pOG44 Flp-Recombinase Expression Vector (Invitrogen™, V600520), and pcDNA5  
330 FRT TO plasmids expressing appropriate miniTurbo gene fusions, using  
331 Lipofectamine™ 2000 (Invitrogen™, 11668027), according to the manufacturer's  
332 instructions. All other plasmid transfections were done using jetOPTIMUS® DNA  
333 Transfection Reagent (Polyplus), according to the manufacturer's instructions.

334

### 335 **Biotin depletion of FBS**

336 To remove residual biotin from serum for BioID assays, Streptavidin Sepharose® High  
337 Performance beads were used (Cytiva, 17-5113-01). 50 µL of packed bead volume was  
338 rinsed three times with 1X phosphate-buffered saline (PBS, pH 7.4, Gibco™ 10010049)

339 in sterile conditions. Beads were spun at 500xg for 1 minute to remove the supernatant,  
340 then resuspended in 1X PBS equal to bead volume for 1:1 bead/PBS ratio.  
341 Resuspended beads were added to 50 mL of FBS, and allowed to mix in 4°C for 3  
342 hours. The serum was then spun at 1000xg for 5 minutes to pellet the beads, and the  
343 supernatant was filtered through a syringe attached to a 0.45 µm low-bind filter under  
344 sterile conditions.

345

### 346 **Cell cycle synchronization coupled to biotinylation**

347 For the asynchronous cell population, miniTurbo-3XFLAG HEK293 Flp-In T-Rex cells  
348 were cultured in DMEM containing 10% biotin-depleted FBS, 1 µg/mL doxycycline and  
349 DMSO for 48 hours. Immediately prior to cell collection, 50 µM D-biotin (Bio Basic,  
350 BB0078) was added to the media for 15 minutes at 37 °C. For G1/S synchronization,  
351 cells were cultured in DMEM containing 10% biotin-depleted FBS and 1 µg/mL  
352 doxycycline on day 1. On day 2, 2.5 µM thymidine (Millipore-Sigma, T9250) was added  
353 to the media for 14 hours at 37 °C. Cultures were then rinsed with 1X PBS and fresh  
354 media with 10% biotin-depleted FBS and 1 µg/mL doxycycline were added for 10 hours  
355 at 37 °C. 2.5 µM thymidine was then added to the media for 24 hours at 37 °C. Cultures  
356 were again rinsed with 1X PBS. Fresh media with 10% biotin-depleted FBS, 1 µg/mL  
357 doxycycline and 50 µM D-biotin were added for 15 minutes immediately prior to cell  
358 collection. For mitotic synchronization, cells were cultured in DMEM containing 10%  
359 biotin-depleted FBS and 1 µg/mL doxycycline on day 1. On day 2, 9 µM RO-3306  
360 (Selleck Chemicals, S7747) was added to the media for 20 hours at 37 °C. Cells were  
361 then rinsed with 1X PBS and incubated in DMEM with 10% biotin-depleted FBS and 1  
362 µg/mL doxycycline at 37 °C for 45 minutes. 50 µM D-biotin was then added to the media  
363 for 15 minutes, and cells were finally collected one hour post-RO-3306 release. Cells  
364 were collected by the addition of warm Trypsin-EDTA Solution, 0.25% (Gibco™,  
365 25200056), and a subset of them were kept resuspended in media for further analysis  
366 by flow cytometry and immunoblotting. Collected cells were pelleted by centrifugation at  
367 500xg for 5 minutes. Cell pellets were weighed, frozen in liquid nitrogen and stored at -  
368 80°C until further analysis. Each biotinylation experiment was performed twice, resulting  
369 in two biological replicates, or two cell pellets, per condition.

### 370 **Validation of BioID samples by flow cytometry and immunoblotting**

371 To prepare for flow cytometry, approximately  $1 \times 10^6$  synchronized HEK293 Flp-In T-Rex  
372 cells were resuspended in 1 mL 3% paraformaldehyde (PFA) solution and incubated at  
373 37 °C for 10 minutes. Ice-cold methanol (at a volume ratio of 1:9 PFA/methanol) was  
374 then added drop-wise to the cell suspension, which was incubated in ice for 30 minutes.  
375 Fixed cells were pelleted by centrifugation at 1000xg at 4°C for 10 minutes and the  
376 supernatant was removed. The remaining pellet was resuspended in 500 µL bovine  
377 serum albumin (BSA, 3% solution in PBS, Sigma-Aldrich, A3294) and centrifuged again  
378 at 1000xg at 4°C for 10 minutes. The supernatant was removed, and the pellet was  
379 resuspended in 500 µL of DAPI (Cayman Chemical, 14285, 20 µg/mL solution in PBS).  
380 The cells were incubated with DAPI at room temperature for 15 minutes, protected from  
381 light, and then analyzed for DAPI fluorescence (405 nm laser, VL-1 channel) using the  
382 Attune™ NxT Flow Cytometer (Invitrogen), until 50,000 cells had passed through the  
383 flow cytometer for each sample. Data was analyzed using the Attune™ NxT Software  
384 v3.1.2.

385 To validate bait expression and successful cell cycle synchronization, synchronized and  
386 induced HEK293 Flp-In T-Rex cells were pelleted by centrifugation at 500xg for 5  
387 minutes, frozen in liquid nitrogen, thawed and lysed with RIPA buffer (50 mM Tris-HCl  
388 pH 8, 150 mM NaCl, 1% Triton X-100, 0.5% sodium deoxycholate, 0.1% SDS).

389 Samples were resolved by SDS-PAGE and immunoblotted with rabbit anti-β-actin  
390 (1:3000, LI-COR Biosciences, 926-42210) as a loading control, mouse anti-FLAG M2  
391 (1:5000, Sigma-Aldrich, F1804) to detect bait expression, rabbit anti-cyclin A2 (1:5000,  
392 Abclonal, A2891) as a G1/S marker and rabbit anti-phospho-histone H3 Ser10 (1:500,  
393 Millipore, 06-570) as a mitotic marker.

394

### 395 **Immunoblotting**

396 For immunoblotting, samples were denatured with 2X or 6X sodium dodecyl sulfate  
397 (SDS) Laemmli buffer and boiled at 95°C for 5 minutes. Protein concentrations were  
398 determined using the Pierce™ BCA Protein Assay Kit (Thermo Fisher Scientific,  
399 23225), according to the manufacturer's instructions. Equal amounts of protein (20-40  
400 µg) were separated by SDS-PAGE. Proteins were transferred to a nitrocellulose

401 membrane (Bio-Rad, 162-0112). The membrane was blocked with SuperBlock blocking  
402 buffer (Fisher, PI37535) at room temperature for 30 minutes and then incubated with  
403 primary antibodies at 4°C overnight, or at room temperature for 1 hour. Next, the  
404 membrane was incubated with one or both of the following secondary antibodies: IRDye  
405 680RD Goat anti-mouse IgG (H + L) (1:15,000, Li-COR Biosciences 926-68071) and  
406 IRDye 800CW Goat anti-rabbit IgG (H + L) (1:15,000, Li-COR Biosciences 926-32211)  
407 at room temperature for 1 hour. All blots were imaged with the Li-COR Odyssey  
408 imaging system and analyzed using Image Studio (Li-COR Biosciences).

409

#### 410 **Biotin-streptavidin affinity purification and on-bead trypsin digest**

411 Frozen cell pellets were first thawed and then lysed, bound to streptavidin-sepharose  
412 beads, trypsinized, dried, and prepared for analysis by mass spectrometry exactly as  
413 described in the protocol detailed in section 3.4.1 in Hesketh et al., 2017.

414

#### 415 **Mass spectrometry data acquisition**

416 Both data-dependent acquisition (DDA) and data-independent acquisition (DIA) were  
417 performed. For DDA, LC-MS/MS, affinity purified and digested peptides were analyzed  
418 using a nano-HPLC (High-performance liquid chromatography) coupled to MS. One-  
419 quarter of the sample was used. Nano-spray emitters were generated from fused silica  
420 capillary tubing, with 100 µm internal diameter, 365 µm outer diameter and 5-8 µm tip  
421 opening, using a laser puller (Sutter Instrument Co., model P-2000, with parameters set  
422 as heat: 280, FIL = 0, VEL = 18, DEL = 2000). Nano-spray emitters were packed with  
423 C18 reversed-phase material (Reprosil-Pur 120 C18-AQ, 3 µm) resuspended in  
424 methanol using a pressure injection cell. Sample in 5% formic acid was directly loaded  
425 at 800 nl/min for 20 minutes onto a 100 µm x 15 cm nano-spray emitter. Peptides were  
426 eluted from the column with an acetonitrile gradient generated by an Eksigent ekspert™  
427 nanoLC 425, and analyzed on a TripleTOF™ 6600 instrument (AB SCIEX, Concord,  
428 Ontario, Canada). The gradient was delivered at 400 nl/min from 2% acetonitrile with  
429 0.1% formic acid to 35% acetonitrile with 0.1% formic acid using a linear gradient of 90  
430 min. This was followed by a 15 minute wash with 80% acetonitrile with 0.1% formic acid,  
431 and equilibration for another 15 minutes to 2% acetonitrile with 0.1% formic acid. The

432 total DDA protocol is 135 minutes. The first DDA scan had an accumulation time of 250  
433 ms within a mass range of 400-1800 Da. This was followed by 10 MS/MS scans of the  
434 top 10 peptides identified in the first DDA scan, with accumulation time of 100 ms for  
435 each MS/MS scan. Each candidate ion was required to have a charge state from 2-5  
436 and a minimum threshold of 300 counts per second, isolated using a window of 50  
437 mDa. Previously analyzed candidate ions were dynamically excluded for 7 seconds.  
438 For DIA, LC-MS/MS, affinity purified and digested peptides were analyzed using a  
439 nano-HPLC (High-performance liquid chromatography) coupled to MS. One-quarter of  
440 the sample was used. Nano-spray emitters were generated from fused silica capillary  
441 tubing, with 100  $\mu\text{m}$  internal diameter, 365  $\mu\text{m}$  outer diameter and 5-8  $\mu\text{m}$  tip opening,  
442 using a laser puller (Sutter Instrument Co., model P-2000, with parameters set as heat:  
443 280, FIL = 0, VEL = 18, DEL = 2000). Nano-spray emitters were packed with C18  
444 reversed-phase material (Reprosil-Pur 120 C18-AQ, 3  $\mu\text{m}$ ) resuspended in methanol  
445 using a pressure injection cell. Sample in 5% formic acid was directly loaded at 800  
446 nl/min for 20 minutes onto a 100  $\mu\text{m}$  x 15 cm nano-spray emitter. Peptides were eluted  
447 from the column with an acetonitrile gradient generated by an Eksigent ekspert™  
448 nanoLC 425, and analyzed on a TripleTOF™ 6600 instrument (AB SCIEX, Concord,  
449 Ontario, Canada). The gradient was delivered at 400 nl/min from 2% acetonitrile with  
450 0.1% formic acid to 35% acetonitrile with 0.1% formic acid using a linear gradient of 90  
451 minutes. This was followed by a 15 minute wash with 80% acetonitrile with 0.1% formic  
452 acid, and equilibration for another 15 minutes to 2% acetonitrile with 0.1% formic acid.  
453 The total DIA protocol is 135 minutes. The first DIA scan had an accumulation time of  
454 250 ms within a mass range of 400-1800 Da. This was followed by 54 MS/MS scans  
455 with differing mass windows, with an accumulation time of 65 ms per scan.

456

#### 457 **Mass spectrometry data analysis**

458 Mass spectrometry data generated were stored, searched and analyzed using ProHits  
459 laboratory information management system (LIMS) platform (Liu et al., 2016). Within  
460 ProHits, WIFF files were converted to an MGF format using the WIFF2MGF converter  
461 and to an mzML format using ProteoWizard (V3.0.10702) and the AB SCIEX MS Data  
462 Converter (V1.3 beta).



463 DDA acquisition data was searched using Mascot (V2.3.02) (Perkins et al., 1999) and  
464 Comet (V2016.01 rev.2, (Eng et al., 2013). The spectra were searched with the human  
465 and adenovirus sequences in the RefSeq database (version 57, January 30th, 2013)  
466 acquired from NCBI, supplemented with “common contaminants” from the Max Planck  
467 Institute ([http://www.coxdocs.org/doku.php?id=maxquant:start\\_downloads.htm](http://www.coxdocs.org/doku.php?id=maxquant:start_downloads.htm)) and the  
468 Global Proteome Machine (GPM; <ftp://ftp.thegpm.org/fasta/cRAP>), forward and reverse  
469 sequences (labeled “gj|9999” or “DECOY”), sequence tags (BirA, GST26, mCherry and  
470 GFP) and streptavidin, for a total of 72,481 entries. Database parameters were set to  
471 search for tryptic cleavages, allowing up to 2 missed cleavages sites per peptide with a  
472 mass tolerance of 35 ppm for precursors with charges of 2+ to 4+ and a tolerance of  
473 0.15 amu for fragment ions. Variable modifications were selected for deamidated  
474 asparagine and glutamine and oxidized methionine. Results from each search engine  
475 were analyzed through TPP (the Trans-Proteomic Pipeline, v.4.7 POLAR VORTEX rev  
476 1) via the iProphet pipeline (Shteynberg et al., 2011).

477 DIA acquisition data was searched using MS-GFDB (Wang et al., 2015). The spectra  
478 were searched with the human and adenovirus sequences in the RefSeq database  
479 (version 57, January 30th, 2013) acquired from NCBI, supplemented with “common  
480 contaminants” from the Max Planck Institute  
481 ([http://www.coxdocs.org/doku.php?id=maxquant:start\\_downloads.htm](http://www.coxdocs.org/doku.php?id=maxquant:start_downloads.htm)) and the Global  
482 Proteome Machine (GPM; <ftp://ftp.thegpm.org/fasta/cRAP>), for a total of 36,361 entries.  
483 Database parameters were set to search for tryptic cleavages, with a mass tolerance of  
484 50 ppm for precursors with charges of 2+ to 4+ and a peptide length of 8 to 30 amino  
485 acids. Oxidized methionine was set as the variable modification. DDA files were used to  
486 generate a spectral library for the SWATH files.

487

### 488 **SAINT analysis**

489 The SAINT analysis tool is used to identify high-confidence protein interactors versus  
490 control samples (Teo et al., 2014). SAINTexpress version 3.6.1 was used for DDA and  
491 version 3.6.3 for MSPLIT. SAINT analysis was performed using two biological replicates  
492 per bait for both DDA and MSPLIT. Six negative control experiments with miniTurbo-  
493 3xFLAG-alone samples were conducted for BioID; two asynchronous replicates, two in

494 G1/S and two in mitosis. SAINT probabilities were calculated independently for each  
495 sample, averaged (AvgP) across biological replicates and reported as the final SAINT  
496 score. Prior to applying SAINT, proteins were filtered with iProphet  $\geq 0.95$  and unique  
497 peptides  $\geq 2$  for DDA and unique peptides  $\geq 2$  for MSPLIT. Proteins with a BFDR  
498 (Bayesian False Discovery Rate)  $\leq 0.01$  are considered high-confidence protein  
499 interactors. Heat maps were generated from SAINT output via ProHits-viz (Knight et al.,  
500 2015).

501

### 502 **Filtered prey dataset**

503 For each prey, the averaged spectral counts obtained with miniTurbo alone (2 replicates  
504 x 3 conditions) were subtracted from averaged spectral counts with miniTurbo-CNA  
505 (wild type or mutant) for each condition (background subtracted spectral counts, Table  
506 S1). Final dataset of 41 proteins resulted from 38 preys from DDA analysis and 3  
507 additional preys from DIA/mSPLIT analysis, that were significantly biotinylated by  
508 miniTurbo-CNA<sub>WT</sub> (unique peptides  $\geq 2$ , BFDR  $\leq 0.01$ ) in at least one condition. PxlIT-  
509 dependent proteins displayed  $\text{Log}_2$  (spectral counts with miniTurbo-CNA<sub>WT</sub>/miniTurbo-  
510 CNA<sub>NIRmut</sub>)  $\geq 0.5$  for at least one condition. For preys with spectral counts with  
511 miniTurbo-CNA<sub>NIRmut</sub> = 0, values were converted to 0.5 to calculate CNA<sub>WT</sub>/CNA<sub>NIRmut</sub>  
512 ratios.

513

### 514 **GST-PxlIT peptide purification**

515 Oligos coding for 16-mer peptides with PxlIT motifs in the center were fused to GST in  
516 a pGEX-4T-3 vector and expressed in BL21 (DE3) chemically competent E. coli (Sigma-  
517 Aldrich, CMC0014). Bacteria were grown in 37°C until mid-log phase and expression  
518 was induced with 1 mM isopropyl- $\beta$ -D-thiogalactopyranoside (IPTG, P212121, GB-  
519 I0920) addition for 2 hours. Bacteria were lysed with CellLytic™ B Cell Lysis Reagent  
520 (Millipore-Sigma, B7435) according to the manufacturer's instructions. Cell lysates  
521 expressing GST-peptides were incubated with Glutathione Sepharose™ 4B beads  
522 (Cytiva, 17-0756-01) in 4°C for 2-4 hours and the beads were then isolated and eluted  
523 through a Bio-Spin® Chromatography Column (Bio-Rad, #7326008) with elution buffer  
524 (5 0mM Tris-HCl pH 8, 300 mM NaCl, 0.1% NP-40, 5 mM Dithiothreitol-DTT, 40 mM

525 glutathione, NaOH added to adjust buffer pH to 8). The eluates were allowed to dialyze  
526 in 4°C overnight in dialysis buffer (100 mM Tris-HCl pH 8, 150 mM NaCl, 1 mM β-  
527 mercaptoethanol) to remove residual glutathione. Purified peptides were stored in 10%  
528 glycerol at -80°C.

529

### 530 **6xHis-tagged calcineurin and maltose binding protein purification**

531 6xHis-tagged human calcineurin A (α isoform, truncated at residue 392), WT or  
532 <sup>330</sup>NIR<sup>332\_330</sup>AAA<sup>332</sup> mutant were expressed in tandem with the calcineurin B subunit in a  
533 p11 vector in BL21 (DE3) chemically competent *E. coli*. Similarly, 6xHis-tagged, WT  
534 maltose binding protein (MBP) was expressed in a p11 vector in BL21 (DE3) chemically  
535 competent *E. coli*. Bacteria were grown in 37°C until mid-log phase and expression was  
536 induced with 1 mM IPTG at 16°C for 18 hours. Cells were pelleted, washed, and frozen  
537 at -80°C for at least 12 hours. Thawed cell pellets were resuspended in lysis buffer (50  
538 mM Tris-HCl pH 7.5, 150 mM NaCl, 0.1% Tween 20,  
539 1 mM β-mercaptoethanol, protease inhibitors) and lysed by sonication using four 1-  
540 minute pulses at 40% output. Extracts were clarified using two rounds of centrifugation  
541 (20,000xg, 20 minutes, 4°C) and then bound to Ni-NTA agarose beads (Invitrogen,  
542 R901-15) in lysis buffer containing 5mM imidazole for 2–4 hours at 4°C. Bound beads  
543 were loaded onto a Bio Spin® Chromatography Column and washed with lysis buffer  
544 containing 20mM imidazole (Sigma-Aldrich, I0250) and eluted with lysis buffer  
545 containing 300mM imidazole, pH 7.5. Purified proteins were dialyzed in buffer (50 mM  
546 Tris-HCl pH 7.5, 150mM NaCl, 1 mM β-mercaptoethanol) and stored in 10% glycerol at  
547 -80°C.

548

### 549 ***In vitro* GST peptide binding**

550 1-2 μg of purified 6xHis-tagged calcineurin or 6xHis-MBP as a negative control was first  
551 bound to 10 μL magnetic Dynabeads™ His-Tag Isolation and Pulldown Beads (Thermo  
552 Fisher Sci., 10104D) in 490 μL base buffer (50 mM Tris-HCl pH 7.5, 150 mM NaCl, 0.1%  
553 Tween 20, 1 mM β-mercaptoethanol, protease inhibitors), supplemented with 15 mM  
554 imidazole and 0.5 mg/ml BSA for 1.5 hours at 4°C. 7-10 μg of appropriate purified GST-  
555 peptides were then added to the binding reaction and incubated further for 2 hours at

556 4°C. 3% of the total reaction mix was removed as ‘input’ prior to the incubation, boiled in  
557 Laemmli sample buffer, and stored at –20°C. The beads were washed in base buffer  
558 containing 20mM imidazole and bound proteins were eluted by boiling in Laemmli  
559 sample buffer for 5 minutes, followed by SDS–PAGE and immunoblotting with goat anti-  
560 GST (1:3000, Cytiva, 27-4577-01) and mouse anti-6xHis (1:3000, Takara Bio, 631212)  
561 antibodies. Secondary antibodies used were IRDye 680RD Goat anti-mouse IgG (H + L)  
562 (1:15,000, Li-COR Biosciences 926-68071) and IRDye 800CW Donkey anti-goat IgG (H  
563 + L) (1:15,000, Li-COR Biosciences 926-32214). GST peptides co-purifying with 6xHis-  
564 tagged proteins were normalized to their respective input and amount of His-protein  
565 pulled down. Co-purification with CN was reported relative to that of the peptide with the  
566 known PxIxIT motif from NFATC1: PALESPRIEITSCLGL. POC5 peptides used were  
567 POC5 PDVRIS: KGELVPDVRISTIHDl and POC5 ADARAA Mut:  
568 KGELVADARAATIHDl. Statistical significance was determined with unpaired, two-tailed  
569 Student’s t test, using GraphPad Prism 9. *In vitro* GST pulldown experiments were  
570 performed in three biological replicates.

571

### 572 **Calcineurin and POC5 co-immunoprecipitation assays**

573 HEK293T cells transfected with plasmids expressing 6xmyc-tagged POC5 (WT or  
574 <sup>57</sup>ADARAA<sup>68</sup> mutant) and GFP-tagged FLAG or GFP-CNA subunit α isoform were  
575 washed with 1X PBS and harvested. Cell pellets were snap-frozen in liquid nitrogen and  
576 stored at –80°C until use. Thawed cell pellets were lysed with lysis buffer (50 mM Tris-  
577 HCl pH 7.5, 150 mM NaCl, 1% NP-40), supplemented with Halt™ Protease and  
578 Phosphatase Inhibitor Cocktail (Thermo Scientific, 78440) and subjected to fine needle  
579 aspiration through a sterile 27.5-gauge needle. Cell lysates were clarified by  
580 centrifugation at 16,000xg for 20 minutes in 4°C and protein concentrations were  
581 determined using the Pierce™ BCA Protein Assay Kit, according to the manufacturer’s  
582 instructions. 1 mg of protein from each lysate was added to 20 μL of pre-washed anti-c-  
583 myc magnetic beads (Med Chem Express, HY-K0206) and the volume of each reaction  
584 was equalized to 500 μL with binding buffer (50 mM Tris-HCl pH 7.5, 150 mM NaCl,  
585 0.5% NP-40, Halt™ Protease and Phosphatase Inhibitor Cocktail). 2.5% of the total  
586 reaction mix was removed as ‘input’ prior to the incubation, boiled in Laemmli sample

587 buffer, and stored at  $-20^{\circ}\text{C}$ . The reactions were then rotated gently at  $4^{\circ}\text{C}$  overnight.  
588 Beads were washed four times with wash buffer (0.5% Triton X-100, Halt™ Protease  
589 and Phosphatase Inhibitor Cocktail in 1X PBS) and boiled in 2X Laemmli sample buffer  
590 for 5 minutes. 50% of 'input' and 'immunoprecipitated' fractions were resolved by SDS-  
591 PAGE and immunoblotted with rabbit anti-myc (1:3000, 71D10, Cell Signaling  
592 Technology, 2278S) and mouse anti-GFP (1:3000, Santa Cruz Biotechnology, sc-9996)  
593 antibodies. Four biological replicates of this experiment were performed. GFP-tagged  
594 proteins co-immunoprecipitating with 6xmyc-tagged POC5 were normalized to their  
595 respective input and then over the amount of 6xmyc-POC5 bound to the beads.  
596 Statistical significance was determined with ratio-paired, two-tailed Student's t test,  
597 using GraphPad Prism 9.

598

### 599 **Immunoprecipitation and *in vitro* dephosphorylation of POC5**

600 HeLa cells were transfected with plasmid expressing wild-type 6xmyc-tagged POC5 and  
601 divided between two plates: one where cells were treated with DMSO, and another  
602 where cells were treated with 100 ng/mL nocodazole (Cell Signaling Technology,  
603 2190S) for 18 hours at  $37^{\circ}\text{C}$ . DMSO or nocodazole were washed out with 1X PBS and  
604 cells were incubated with fresh, drug-free media for an hour at  $37^{\circ}\text{C}$ . Cells were  
605 harvested, pelleted, frozen in liquid nitrogen and stored at  $-80^{\circ}\text{C}$  until use. Thawed cell  
606 pellets were lysed with lysis buffer (50mM Tris-HCl pH 7.5, 150mM NaCl, 1% NP-40),  
607 supplemented with Halt™ Protease and Phosphatase Inhibitor Cocktail and subjected  
608 to fine needle aspiration through a sterile 27.5-gauge needle. Cell lysates were clarified  
609 by centrifugation at 16,000xg for 20 minutes in  $4^{\circ}\text{C}$  and protein concentrations were  
610 determined using the Pierce™ BCA Protein Assay Kit, according to the manufacturer's  
611 instructions. 500  $\mu\text{g}$  of protein from each lysate was added to 20  $\mu\text{L}$  of pre-washed anti-  
612 c-myc magnetic beads (Med Chem Express, HY-K0206) and the volume of each  
613 reaction was equalized to 500  $\mu\text{L}$  with binding buffer (50 mM Tris-HCl pH 7.5, 150 mM  
614 NaCl, 0.5% NP-40, Halt™ Protease and Phosphatase Inhibitor Cocktail). 2.5% of the  
615 total reaction mix was removed as 'input' prior to the 2 hour incubation, boiled in 2X  
616 Laemmli sample buffer, and stored at  $4^{\circ}\text{C}$ . The bead binding mixtures were then rotated  
617 gently at  $4^{\circ}\text{C}$  for 2 hours. Beads were washed twice with wash buffer (0.5% Triton X-

618 100, Halt™ Protease and Phosphatase Inhibitor Cocktail in 1X PBS) and then washed  
619 twice with either  $\lambda$  dephosphorylation buffer (1 mM MnCl<sub>2</sub>, 1X PMP buffer, New England  
620 Biolabs, P0753, protease inhibitors) or CN dephosphorylation buffer (50 mM Tris-HCl  
621 pH 8, 100 mM NaCl, 6 mM MgCl<sub>2</sub>, 1 mM CaCl<sub>2</sub>, 1mM DTT, protease inhibitors). Finally,  
622 the beads were incubated in  $\lambda$  dephosphorylation buffer or CN dephosphorylation  
623 buffer, with or without phosphatase addition (0.25  $\mu$ L of  $\lambda$  phosphatase in 50  $\mu$ L reaction  
624 volume, New England Biolabs, P0753 or 200 nM purified 6xHis-Calcineurin) and with or  
625 without phosphatase inhibitor addition (Halt™ Protease and Phosphatase Inhibitor  
626 Cocktail and 5 mM EDTA), as required. Dephosphorylation was allowed to occur for 45  
627 minutes at 30°C under constant shaking. Reactions were stopped with 2X Laemmli  
628 buffer and boiled for 5 minutes. Proteins were analyzed on 6% acrylamide SDS-PAGE  
629 gels followed by immunoblotting with rabbit anti-myc (1:3000, 71D10, Cell Signaling  
630 Technology, 2278S). *In vitro* dephosphorylation experiments were performed in three  
631 biological replicates.

632

### 633 **Cytosol extraction and immunofluorescence microscopy**

634 HeLa, IMCD3 or hTERT-RPE1 cells were grown on poly-L-lysine (Sigma-Aldrich,  
635 P4707) pre-treated 12 mm, #1.5H glass coverslips (ThorLabs). If cytosol extraction was  
636 not required, cells were directly fixed in ice-cold methanol at -20°C for 15 minutes. For  
637 cytosol-extracted RPE1 cells, the coverslips were first washed with warm 0.02%  
638 digitonin in PBS solution and rocked gently for 5 minutes at room temperature, followed  
639 by one wash with 1X PBS and methanol fixation at -20°C for 15 minutes. Following  
640 methanol fixation, coverslips were washed thrice with 1X PBS and then placed in a dark  
641 humid chamber and treated with blocking buffer (0.2 M glycine, 0.1% Triton X-100,  
642 2.5% FBS in PBS) for 30 minutes. Coverslips were incubated with primary antibodies  
643 diluted in block buffer for 1 hour, washed multiple times with 1X PBS, followed by  
644 incubation with secondary antibodies for 45 minutes, multiple washes with 1X PBS and  
645 a 15-minute incubation with 5  $\mu$ g/mL DAPI at room temperature. Coverslips were  
646 washed again and mounted on glass slides using ProLong® Diamond Antifade  
647 Mountant (Thermo Fisher, P36965).

648 Primary antibodies used in immunofluorescence: mouse anti-centrin2, clone 20H5  
649 (1:500, EMD Millipore, 04-1624), mouse anti-centrin3 3E6 (1:500, Abnova, H00001070-  
650 M01), rabbit anti-myc 71D10 (1:300, Cell Signaling Technology, 2278S), rabbit anti-  
651 POC5 CE037 (1:100, Invitrogen, PA524308), mouse anti-CNB (1:100, Sigma-Aldrich,  
652 C0581), rabbit anti-calcineurin pan A (1:100, EMD Millipore, 07-1491). Secondary  
653 antibodies used: goat anti-mouse Alexa Fluor 594 (1:1000, Invitrogen A11032), goat  
654 anti-rabbit Alexa Fluor 488 (1:1000, Invitrogen A11008). Imaging was performed at the  
655 Stanford University Cell Sciences Imaging Facility (CCIF RRID:SCR\_017787), using an  
656 Inverted Zeiss LSM 880 confocal laser scanning microscope with either a 1.3 NA 40x  
657 EC Plan Neo oil immersion objective or a 1.4 NA 63x Plan Apo oil immersion objective.  
658 Lasers used were Diode 405nm 0.2-0.8mW, HeNe 594nm 2mW and Ar 488nm 25mW.  
659 Images were acquired at constant exposure settings within experiments using the Zen  
660 Black software (Carl Zeiss). Image J was used for image analysis, line intensity plots  
661 and quantification of fluorescence intensities.

662

### 663 **Ultrastructure expansion microscopy (U-ExM)**

664 hTERT-RPE1 cells were grown on 12 mm, #1.5H glass coverslips and treated either  
665 with DMSO (control) or 2.5  $\mu$ M FK506 (LC laboratories, F4900) for 48 hours. Coverslips  
666 were fixed in ice-cold methanol at -20°C for 10 minutes and washed with 1X PBS.  
667 Following fixation, U-ExM was performed as previously described in (Gamberotto et al.,  
668 2019). Briefly, coverslips were incubated overnight in an acrylamide/formaldehyde  
669 solution (AA/FA, 0.7% formaldehyde, 1% acrylamide in PBS) at 37°C. Gelation was  
670 allowed to proceed in monomer solution (19% sodium acrylate, 10% acrylamide, 0.1%  
671 bis-acrylamide, 0.5% ammonium persulfate-APS, 0.5% TEMED) and the coverslips  
672 were discarded. Gels were boiled in denaturation buffer (200 mM SDS, 200 mM NaCl,  
673 50 mM Tris pH 9) at 95°C for 1 hour. After denaturation buffer was removed, gels were  
674 washed with multiple water rinses and allowed to expand in water at room temperature  
675 overnight. Small circles of each expanded gel (approximately 5 mm in diameter) were  
676 excised and incubated with primary antibodies diluted in PBSBT buffer (3% BSA, 0.1%  
677 Triton X-100 in PBS) on a nutator at 4°C overnight. The next day, gels were washed  
678 thrice with PBSBT buffer and incubated with secondary antibodies and 5  $\mu$ g/mL DAPI

679 diluted in PBSBT, protected from light, on a nutator at 4°C overnight. Immunostained  
680 gels were washed once with 1X PBS and thrice with water, and placed in a glass-  
681 bottom, poly-L-lysine treated 35mm plate for imaging. Primary antibodies used in  
682 expansion microscopy were: mouse anti-polyglutamylated tubulin GT335 (1:500,  
683 AdipoGen, AG20B0020C100), rabbit anti-calceineurin pan A (1:100, EMD Millipore, 07-  
684 1491), mouse anti-CNB (1:100, Sigma-Aldrich, C0581), rabbit anti-POC5 CE037 (1:500,  
685 Invitrogen, PA524308), mouse anti-acetylated tubulin clone 6-11B-1 (1:500, Sigma-  
686 Aldrich, T6793), mouse anti-gamma tubulin GTU-88 (1:500, Abcam, ab11316).  
687 Secondary antibodies used were: goat anti-mouse IgG1 Alexa Fluor 488 (1:1000,  
688 Invitrogen, A21121), goat anti-mouse IgG2b Alexa Fluor 488 (1:1000, Invitrogen, A-  
689 21141), goat anti-rabbit Alexa Fluor 647 (1:500, Invitrogen, A21245), goat anti-mouse  
690 IgG2b Alexa Fluor 647 (1:500, Invitrogen, A21242), goat anti-mouse IgG2b Alexa Fluor  
691 568 (1:500, Invitrogen, A21144), goat anti-mouse IgG2a Alexa Fluor 568 (1:500,  
692 Invitrogen, A21134), goat anti-rabbit Alexa Fluor 568 (1:500, Invitrogen, A11011). All  
693 expansion microscopy images were acquired as single planes or Z-stacks collected at  
694 0.27- $\mu$ m intervals using a confocal Zeiss Axio Observer microscope (Carl Zeiss) with a  
695 PlanApoChromat 1.4 NA 63x oil immersion objective, a Yokogawa CSU-W1 head, and  
696 a Photometrics Prime BSI express CMOS camera. Slidebook software (Intelligent  
697 Imaging Innovations, 3i) was used to control the microscope system. Image J was used  
698 for image analysis and quantification of fluorescence intensities.

699

#### 700 **Sucrose fractionation for nuclear/centrosomal fractions**

701 HeLa cells were resuspended in 1X PBS buffer, followed by addition of lysis buffer (10  
702 mM Tris-HCl, pH 7.5, 10 mM NaCl, 3 mM MgCl<sub>2</sub>, 1% NP-40, 10% sucrose and protease  
703 inhibitors) at 1 mL per 1x10<sup>7</sup> cells. Lysed cells were centrifuged at 100xg at 4°C for 5  
704 minutes. A small fraction of the supernatant was flash-frozen and stored in -80°C as the  
705 cytosolic fraction and the rest was discarded. The pellet containing the nuclei and  
706 centrosomes was incubated at room temperature for 30 minutes in the same volume of  
707 digestion buffer (10 mM K-PIPES pH 6.8, 50 mM NaCl, 3 mM MgCl<sub>2</sub>, 1 mM EGTA, 10%  
708 sucrose, 0.1 mg/mL DNase I, 0.1 mg/mL RNase A) as the volume used for lysis buffer.  
709 (NH<sub>4</sub>)<sub>2</sub>SO<sub>4</sub> and NaCl solutions were then added at final concentrations of 0.25 M and 1



710 M respectively. The mixture was centrifuged at 15,000 xg for 15 minutes over a 1 mL  
711 cushion made of 60% sucrose in digestion buffer. After centrifugation, 2 mL of material  
712 (1 mL of supernatant and 1 mL of cushion) was collected at the 10-60% sucrose  
713 interphase and contents were vortexed, flash-frozen and stored at -80°C.

714

#### 715 **Anti-CNB antibody blocking**

716 60 µg of BSA protein (Sigma-Aldrich, A3294) and 60 µg purified 6xHis-CNA $\alpha$  copurified  
717 with regulatory subunit CNB were resolved by SDS-PAGE and transferred to a  
718 nitrocellulose membrane (Bio-Rad, 162-0112). The membrane was stained with  
719 Ponceau S solution (Sigma-Aldrich, P7170) for 15 minutes and rinsed twice with  
720 distilled water to visualize the bands of interest. The membrane was excised around the  
721 bands corresponding to BSA and CNB and the membrane strips were first washed with  
722 water to remove excess Ponceau, and then blocked with 5% milk in TBST buffer (Tris-  
723 buffered saline with 0.1% Tween-20) for 1 hour at room temperature. The strips were  
724 then rinsed twice in TBST buffer, and twice in PBSBT buffer. Finally, each strip was  
725 incubated with 99 µL PBSBT and 1 µL mouse anti-CNB antibody (Sigma-Aldrich,  
726 C0581, 1:100), on the nutator for five hours at room temperature. The membrane strips  
727 were then discarded and the antibody mixture was added onto coverslips to stain them  
728 for immunofluorescence as described.

729

#### 730 **Centriole length and percent POC5 / $\gamma$ -tubulin coverage measurements**

731 All measurements were performed on Image J using expansion microscopy, single z-  
732 plane images of hTERT-RPE1 centrioles after 48-hour treatment with DMSO or 2.5 µM  
733 FK506. Overall centriole length was quantified using acetylated tubulin staining and  
734 coverage length was determined by anti-POC5 or anti- $\gamma$ -tubulin staining, exactly as  
735 previously described for GCP4 coverage (Schweizer et al., 2021).

736

#### 737 **Percent ciliation and cilia length measurements**

738 To measure changes in the maintenance of existing cilia, IMCD3 cells were grown to  
739 confluency on 12 mm, #1.5H glass coverslips. Two days after reaching confluency, cells  
740 were treated with DMSO, 10 µM forskolin (Sigma-Aldrich, F3917), 2.5 µM FK506 or 2.5

741  $\mu\text{M}$  cyclosporin A (Sigma-Aldrich, 30024) for 3 hours at  $37^\circ\text{C}$ . Coverslips were fixed in  
742 4% PFA for 10 minutes in room temperature and then prepared for  
743 immunofluorescence. Four biological replicates of this experiment were performed.  
744 To measure changes during active ciliogenesis, IMCD3 cells were grown to 90%  
745 confluency on a 10 cm tissue culture plate containing two 12 mm, #1.5H glass  
746 coverslips. The coverslips were removed and fixed in 4% PFA for 10 minutes in room  
747 temperature and then prepared for immunofluorescence. The remaining cells on the  
748 plate were trypsinized and split into two fully confluent 3.5 cm tissue culture plates with  
749 glass coverslips. One plate contained media supplemented with DMSO and the other  
750 with  $2.5 \mu\text{M}$  FK506. 24 hours after drug treatment, two coverslips from the DMSO-  
751 treated plate and two from the FK506-treated plate were removed, fixed and stained for  
752 immunofluorescence. The same procedure was performed again 48 hours after drug  
753 treatment began. This experiment was performed in triplicate. Primary antibodies used  
754 to stain cilia were rabbit anti-Arl13b (1:250, Proteintech, 17711-1-AP) and mouse anti-  
755 polyglutamylated tubulin GT335 (1:500, AdipoGen, AG20B0020C100).  
756 Immunofluorescence and image acquisition was performed as detailed in the 'cytosol  
757 extraction and immunofluorescence' section of the Methods. Image J was used to count  
758 the number of cells (determined from DAPI-stained nuclei in maximum projection of all  
759 z-planes) in each image. The CiliaQ plugin for Image J  
760 (<https://github.com/hansenjn/CiliaQ>) (Hansen et al., 2021) with the CANNY 3D  
761 segmentation method was used to determine the number and lengths of Arl13b-stained  
762 cilia from z-stacks collected at  $0.5 \mu\text{m}$  intervals in the 488 nm channel. Using R Studio,  
763 cilia length data were accumulated and filtered so that only single-branched cilia with  
764 length over  $1 \mu\text{m}$  were selected for further analysis.  
765 Percent ciliation was determined by  $\# \text{cilia with length} > 1 \mu\text{m}$  (Arl13b as a 3D vector in a  
766 z-stack) /  $\# \text{nuclei}$  (DAPI in maximum projection images of a confocal z-stack).

767

## 768 **Statistics**

769 All significance testing was conducted using GraphPad Prism 9. n.s., not significant,  
770  $*p < 0.05$ ,  $**p < 0.01$ ,  $***p < 0.001$ .

771

772

## 773 **Acknowledgements**

774

775 We thank all members of the Cyert Lab for providing support and editorial assistance;  
776 members of the Tim Stearns and Jan Skotheim Labs (Stanford University, CA, USA) for  
777 feedback, support, reagents and cell lines, and in particular Mardo Kõivomägi for  
778 reagents and expertise regarding phosphorylation assays; Richard Lewis and Kang  
779 Shen (Stanford University, CA, USA) for critical feedback; Jan Niklaus Hansen and  
780 Dagmar Wachten (University of Bonn, Bonn, Germany) for sharing and providing  
781 assistance with the CiliaQ software; Peter Jackson (Stanford University, CA, USA) for  
782 IMCD3 cell lines; Anne-Marie Tassin (Institute for Integrative Biology of the Cell, Gif-sur-  
783 Yvette, France) and Juliette Azimzadeh (Institut Jacques Monod, Paris, France) for  
784 sharing centrosomal fractionation protocols; Kitty Lee and the Stanford University Cell  
785 Sciences Imaging Facility (CCIF RRID:SCR\_017787) for providing help, training and  
786 equipment for confocal imaging.

787

## 788 **Competing interests**

789

790 No competing interests declared.

791

## 792 **Funding**

793

794 M.S.C., E.T. and I.U.-T. are funded by National Institute of Health (NIH) grant R35  
795 GM136243. E.T. also acknowledges funding from the Stanford Graduate Fellowship  
796 (SGF). J.T.W. is supported by NIH grant K99 GM131024 and T.S. by NIH grant R35  
797 GM13028602. Mass spectrometry was performed at the Network Biology Collaborative  
798 Centre at the Lunenfeld-Tanenbaum Research Institute, with support from the Canadian  
799 Foundation for Innovation, Ontario Government, Genome Canada, and Ontario  
800 Genomics (OGI-139). This research was supported by Foundation and Project grants  
801 from the Canadian Institutes of Health Research to A.-C.G.

## 802 **Author contributions**

803 Conceptualization: M.S.C., E.T., J.T.W.; Investigation: E.T., J.T.W., C.J.W., I.U.-T., T.S.,  
804 A.-C.G.; Data curation: E.T., C.J.W., A.-C.G., I.U.-T.; Writing - original draft: E.T.;  
805 Writing - review & editing: M.S.C., I.U.-T., J.T.W., T.S.; Visualization: E.T., J.T.W.;  
806 Supervision: M.S.C.; Project administration: M.S.C.; Funding acquisition: M.S.C.

## 807 **Data availability**

808  
809 MS DDA Data has been deposited as a complete submission to the MassIVE repository  
810 (<https://massive.ucsd.edu/ProteoSAFe/static/massive.jsp>) and assigned the accession  
811 number MSV000089647. The ProteomeXchange accession is PXD034502. The dataset  
812 is currently available for reviewers at <ftp://MSV000089647@massive.ucsd.edu>. Please  
813 login with username MSV000089647reviewer; password: POC5.

814 MS DIA Data has been deposited as a complete submission to the MassIVE repository  
815 (<https://massive.ucsd.edu/ProteoSAFe/static/massive.jsp>) and assigned the accession  
816 number MSV000089651. The ProteomeXchange accession is PXD034506. The dataset  
817 is currently available for reviewers at <ftp://MSV000089651@massive.ucsd.edu>. Please  
818 login with username MSV000089651\_reviewer; password: POC5. Both datasets will be  
819 made public upon acceptance of the manuscript.

820  
821

## 822 **References**

823  
824 **Almeida, J. L., Dakic, A., Kindig, K., Kone, M., Letham, D. L. D., Langdon, S., Peat,**  
825 **R., Holding-Pillai, J., Hall, E. M., Ladd, M., et al. (2019).** Interlaboratory study  
826 to validate a STR profiling method for intraspecies identification of mouse cell  
827 lines. *PLoS One* **14**, e0218412.

828 **Avasthi, P. and Marshall, W. F. (2012).** Stages of ciliogenesis and regulation of ciliary  
829 length. *Differentiation* **83**, S30-42.

830 **Azimzadeh, J., Hergert, P., Delouvé, A., Euteneuer, U., Formstecher, E.,**  
831 **Khodjakov, A. and Bornens, M. (2009).** hPOC5 is a centrin-binding protein  
832 required for assembly of full-length centrioles. *J. Cell Biol.* **185**, 101–114.

- 833 **Azzi, J. R., Sayegh, M. H. and Mallat, S. G.** (2013). Calcineurin inhibitors: 40 years  
834 later, can't live without. *J. Immunol.* **191**, 5785–5791.
- 835 **Barallon, R., Bauer, S. R., Butler, J., Capes-Davis, A., Dirks, W. G., Elmore, E.,**  
836 **Furtado, M., Kline, M. C., Kohara, A., Los, G. V., et al.** (2010).  
837 Recommendation of short tandem repeat profiling for authenticating human cell  
838 lines, stem cells, and tissues. *In Vitro Cell. Dev. Biol. Anim.* **46**, 727–732.
- 839 **Berridge, M. J., Bootman, M. D. and Roderick, H. L.** (2003). Calcium signalling:  
840 dynamics, homeostasis and remodelling. *Nat. Rev. Mol. Cell Biol.* **4**, 517–529.
- 841 **Besschetnova, T. Y., Kolpakova-Hart, E., Guan, Y., Zhou, J., Olsen, B. R. and**  
842 **Shah, J. V.** (2010). Identification of signaling pathways regulating primary cilium  
843 length and flow-mediated adaptation. *Curr. Biol.* **20**, 182–187.
- 844 **Branon, T. C., Bosch, J. A., Sanchez, A. D., Udeshi, N. D., Svinkina, T., Carr, S. A.,**  
845 **Feldman, J. L., Perrimon, N. and Ting, A. Y.** (2018). Efficient proximity labeling  
846 in living cells and organisms with TurboID. *Nat. Biotechnol.* **36**, 880–887.
- 847 **Brauer, B. L., Moon, T. M., Sheftic, S. R., Nasa, I., Page, R., Peti, W. and**  
848 **Kettenbach, A. N.** (2019). Leveraging new definitions of the LxVP SLiM to  
849 discover novel calcineurin regulators and substrates. *ACS Chem. Biol.* **14**, 2672–  
850 2682.
- 851 **Choi, Y.-H., Suzuki, A., Hajarnis, S., Ma, Z., Chapin, H. C., Caplan, M. J., Pontoglio,**  
852 **M., Somlo, S. and Igarashi, P.** (2011). Polycystin-2 and phosphodiesterase 4C  
853 are components of a ciliary A-kinase anchoring protein complex that is disrupted  
854 in cystic kidney diseases. *Proc. Natl. Acad. Sci. U. S. A.* **108**, 10679–10684.
- 855 **Comartin, D., Gupta, G. D., Fussner, E., Coyaud, É., Hasegan, M., Archinti, M.,**  
856 **Cheung, S. W. T., Pinchev, D., Lawo, S., Raught, B., et al.** (2013). CEP120  
857 and SPICE1 cooperate with CPAP in centriole elongation. *Curr. Biol.* **23**, 1360–  
858 1366.
- 859 **Dell'Acqua, M. L., Dodge, K. L., Tavalin, S. J. and Scott, J. D.** (2002). Mapping the  
860 protein phosphatase-2B anchoring site on AKAP79. *J. Biol. Chem.* **277**, 48796–  
861 48802.
- 862 **Delling, M., DeCaen, P. G., Doerner, J. F., Febvay, S. and Clapham, D. E.** (2013).  
863 Primary cilia are specialized calcium signalling organelles. *Nature* **504**, 311–314.
- 864 **Eng, J. K., Jahan, T. A. and Hoopmann, M. R.** (2013). Comet: an open-source MS/MS  
865 sequence database search tool. *Proteomics* **13**, 22–24.
- 866 **Farouk, S. S. and Rein, J. L.** (2020). The many faces of calcineurin inhibitor toxicity-  
867 what the FK? *Adv. Chronic Kidney Dis.* **27**, 56–66.

- 868 **Fukushima, K., Wang, M., Naito, Y., Uchihashi, T., Kato, Y., Mukai, S., Yabuta, N.**  
869 **and Nojima, H.** (2017). GAK is phosphorylated by c-Src and translocated from  
870 the centrosome to chromatin at the end of telophase. *Cell Cycle* **16**, 415–427.
- 871 **Gambarotto, D., Zwettler, F. U., Le Guennec, M., Schmidt-Cernohorska, M., Fortun,**  
872 **D., Borgers, S., Heine, J., Schloetel, J.-G., Reuss, M., Unser, M., et al.** (2019).  
873 Imaging cellular ultrastructures using expansion microscopy (U-ExM). *Nat.*  
874 *Methods* **16**, 71–74.
- 875 **Gingras, A.-C., Abe, K. T. and Raught, B.** (2019). Getting to know the neighborhood:  
876 using proximity-dependent biotinylation to characterize protein complexes and  
877 map organelles. *Curr. Opin. Chem. Biol.* **48**, 44–54.
- 878 **Grigoriu, S., Bond, R., Cossio, P., Chen, J. A., Ly, N., Hummer, G., Page, R., Cyert,**  
879 **M. S. and Peti, W.** (2013). The molecular mechanism of substrate engagement  
880 and immunosuppressant inhibition of calcineurin. *PLoS Biol.* **11**, e1001492.
- 881 **Guan, J., Ekwurtzel, E., Kvist, U. and Yuan, L.** (2008). Cohesin protein SMC1 is a  
882 centrosomal protein. *Biochem. Biophys. Res. Commun.* **372**, 761–764.
- 883 **Gupta, G. D., Coyaud, É., Gonçalves, J., Mojarad, B. A., Liu, Y., Wu, Q.,**  
884 **Gheiratmand, L., Comartin, D., Tkach, J. M., Cheung, S. W. T., et al.** (2015).  
885 A dynamic protein interaction landscape of the human centrosome-cilium  
886 interface. *Cell* **163**, 1484–1499.
- 887 **Hansen, J. N., Rassmann, S., Stüven, B., Jurisch-Yaksi, N. and Wachten, D.** (2021).  
888 CiliaQ: a simple, open-source software for automated quantification of ciliary  
889 morphology and fluorescence in 2D, 3D, and 4D images. *Eur. Phys. J. E Soft*  
890 *Matter* **44**, 18.
- 891 **Hassan, A., Parent, S., Mathieu, H., Zaouter, C., Molidperee, S., Bagu, E. T., Barchi,**  
892 **S., Villemure, I., Patten, S. A. and Moldovan, F.** (2019). Adolescent idiopathic  
893 scoliosis associated POC5 mutation impairs cell cycle, cilia length and  
894 centrosome protein interactions. *PLoS One* **14**, e0213269.
- 895 **Helassa, N., Nugues, C., Rajamanoharan, D., Burgoyne, R. D. and Haynes, L. P.**  
896 (2019). A centrosome-localized calcium signal is essential for mammalian cell  
897 mitosis. *FASEB J.* **33**, 14602–14610.
- 898 **Hesketh, G. G., Youn, J.-Y., Samavarchi-Tehrani, P., Raught, B. and Gingras, A.-C.**  
899 (2017). Parallel exploration of interaction space by BioID and affinity purification  
900 coupled to mass spectrometry. *Methods Mol. Biol.* **1550**, 115–136.
- 901 **Hildebrandt, F., Benzing, T. and Katsanis, N.** (2011). Ciliopathies. *N. Engl. J. Med.*  
902 **364**, 1533–1543.

- 903 **Hornbeck, P. V., Zhang, B., Murray, B., Kornhauser, J. M., Latham, V. and**  
904 **Skrzypek, E.** (2015). PhosphoSitePlus, 2014: mutations, PTMs and  
905 recalibrations. *Nucleic Acids Res.* **43**, D512-20.
- 906 **Hossain, D., Javadi Esfehiani, Y., Das, A. and Tsang, W. Y.** (2017). Cep78 controls  
907 centrosome homeostasis by inhibiting EDD-DYRK2-DDB1VprBP. *EMBO Rep.*  
908 **18**, 632–644.
- 909 **Hu, J., Bae, Y.-K., Knobel, K. M. and Barr, M. M.** (2006). Casein kinase II and  
910 calcineurin modulate TRPP function and ciliary localization. *Mol. Biol. Cell* **17**,  
911 2200–2211.
- 912 **Ingebritsen, T. S. and Cohen, P.** (1983). The protein phosphatases involved in cellular  
913 regulation. 1. Classification and substrate specificities. *Eur. J. Biochem.* **132**,  
914 255–261.
- 915 **Joly, D., Ishibe, S., Nickel, C., Yu, Z., Somlo, S. and Cantley, L. G.** (2006). The  
916 polycystin 1-C-terminal fragment stimulates ERK-dependent spreading of renal  
917 epithelial cells. *J. Biol. Chem.* **281**, 26329–26339.
- 918 **Kee, H. L., Dishinger, J. F., Blasius, T. L., Liu, C.-J., Margolis, B. and Verhey, K. J.**  
919 (2012). A size-exclusion permeability barrier and nucleoporins characterize a  
920 ciliary pore complex that regulates transport into cilia. *Nat. Cell Biol.* **14**, 431–  
921 437.
- 922 **Khouj, E. M., Prosser, S. L., Tada, H., Chong, W. M., Liao, J.-C., Sugasawa, K. and**  
923 **Morrison, C. G.** (2019). Differential requirements for the EF-hand domains of  
924 human centrin 2 in primary ciliogenesis and nucleotide excision repair. *J. Cell*  
925 *Sci.* **132**, jcs228486.
- 926 **Knight, J. D. R., Liu, G., Zhang, J. P., Pasculescu, A., Choi, H. and Gingras, A.-C.**  
927 (2015). A web-tool for visualizing quantitative protein-protein interaction data.  
928 *Proteomics* **15**, 1432–1436.
- 929 **Knorz, V. J., Spalluto, C., Lessard, M., Purvis, T. L., Adigun, F. F., Collin, G. B.,**  
930 **Hanley, N. A., Wilson, D. I. and Hearn, T.** (2010). Centriolar association of  
931 ALMS1 and likely centrosomal functions of the ALMS motif-containing proteins  
932 C10orf90 and KIAA1731. *Mol. Biol. Cell* **21**, 3617–3629.
- 933 **Kobayashi, T., Kim, S., Lin, Y.-C., Inoue, T. and Dynlacht, B. D.** (2014). The CP110-  
934 interacting proteins Talpid3 and Cep290 play overlapping and distinct roles in  
935 cilia assembly. *J. Cell Biol.* **204**, 215–229.
- 936 **Lawo, S., Bashkurov, M., Mullin, M., Ferreria, M. G., Kittler, R., Habermann, B.,**  
937 **Tagliaferro, A., Poser, I., Hutchins, J. R. A., Hegemann, B., et al.** (2009).  
938 HAUS, the 8-subunit human Augmin complex, regulates centrosome and spindle  
939 integrity. *Curr. Biol.* **19**, 816–826.

- 940 **Le Guennec, M., Klena, N., Gambarotto, D., Laporte, M. H., Tassin, A.-M., van den**  
941 **Hoek, H., Erdmann, P. S., Schaffer, M., Kovacic, L., Borgers, S., et al. (2020).**  
942 **A helical inner scaffold provides a structural basis for centriole cohesion. *Sci.***  
943 ***Adv.* **6**, eaaz4137.**
- 944 **Li, H., Zhang, L., Rao, A., Harrison, S. C. and Hogan, P. G. (2007).** Structure of  
945 calcineurin in complex with PVIVIT peptide: portrait of a low-affinity signalling  
946 interaction. *J. Mol. Biol.* **369**, 1296–1306.
- 947 **Li, S.-J., Wang, J., Ma, L., Lu, C., Wang, J., Wu, J.-W. and Wang, Z.-X. (2016).**  
948 **Cooperative autoinhibition and multi-level activation mechanisms of calcineurin.**  
949 ***Cell Res.* **26**, 336–349.**
- 950 **Liu, G., Knight, J. D. R., Zhang, J. P., Tsou, C.-C., Wang, J., Lambert, J.-P., Larsen,**  
951 **B., Tyers, M., Raught, B., Bandeira, N., et al. (2016).** Data Independent  
952 Acquisition analysis in ProHits 4.0. *J. Proteomics* **149**, 64–68.
- 953 **Mehta, S., Li, H., Hogan, P. G. and Cunningham, K. W. (2009).** Domain architecture  
954 of the regulators of calcineurin (RCANs) and identification of a divergent RCAN in  
955 yeast. *Mol. Cell. Biol.* **29**, 2777–2793.
- 956 **Mi, H., Muruganujan, A., Casagrande, J. T. and Thomas, P. D. (2013).** Large-scale  
957 gene function analysis with the PANTHER classification system. *Nat. Protoc.* **8**,  
958 1551–1566.
- 959 **Moreno-Leon, L., West, E. L., O’Hara-Wright, M., Li, L., Nair, R., He, J., Anand, M.,**  
960 **Sahu, B., Chavali, V. R. M., Smith, A. J., et al. (2021).** RPGR isoform  
961 imbalance causes ciliary defects due to exon ORF15 mutations in X-linked  
962 retinitis pigmentosa (XLRP). *Hum. Mol. Genet.* **29**, 3706–3716.
- 963 **Naito, Y., Shimizu, H., Kasama, T., Sato, J., Tabara, H., Okamoto, A., Yabuta, N.**  
964 **and Nojima, H. (2012).** Cyclin G-associated kinase regulates protein  
965 phosphatase 2A by phosphorylation of its B $\gamma$  subunit. *Cell Cycle* **11**, 604–616.
- 966 **Perkins, D. N., Pappin, D. J., Creasy, D. M. and Cottrell, J. S. (1999).** Probability-  
967 based protein identification by searching sequence databases using mass  
968 spectrometry data. *Electrophoresis* **20**, 3551–3567.
- 969 **Plotnikova, O. V., Nikonova, A. S., Loskutov, Y. V., Kozyulina, P. Y., Pugacheva, E.**  
970 **N. and Golemis, E. A. (2012).** Calmodulin activation of Aurora-A kinase  
971 (AURKA) is required during ciliary disassembly and in mitosis. *Mol. Biol. Cell* **23**,  
972 2658–2670.
- 973 **Roy, J. and Cyert, M. S. (2020).** Identifying new substrates and functions for an old  
974 enzyme: Calcineurin. *Cold Spring Harb. Perspect. Biol.* **12**, a035436.
- 975 **Rusnak, F. and Mertz, P. (2000).** Calcineurin: Form and function. *Physiol. Rev.* **80**,  
976 1483–1521.



- 977 **Schweizer, N., Haren, L., Dutto, I., Viais, R., Lacasa, C., Merdes, A. and Lüders, J.**  
978 (2021). Sub-centrosomal mapping identifies augmin- $\gamma$ TuRC as part of a  
979 centriole-stabilizing scaffold. *Nat. Commun.* **12**, 6042.
- 980 **Sheftic, S. R., Page, R. and Peti, W.** (2016). Investigating the human Calcineurin  
981 Interaction Network using the  $\pi\phi$ LxVP SLiM. *Sci. Rep.* **6**, 38920.
- 982 **Shteynberg, D., Deutsch, E. W., Lam, H., Eng, J. K., Sun, Z., Tasman, N., Mendoza,**  
983 **L., Moritz, R. L., Aebersold, R. and Nesvizhskii, A. I.** (2011). iProphet: multi-  
984 level integrative analysis of shotgun proteomic data improves peptide and protein  
985 identification rates and error estimates. *Mol. Cell. Proteomics* **10**, M111.007690.
- 986 **Spektor, A., Tsang, W. Y., Khoo, D. and Dynlacht, B. D.** (2007). Cep97 and CP110  
987 suppress a cilia assembly program. *Cell* **130**, 678–690.
- 988 **Stevenson, N. L., Bergen, D. J. M., Xu, A., Wyatt, E., Henry, F., McCaughey, J.,**  
989 **Vuolo, L., Hammond, C. L. and Stephens, D. J.** (2018). Regulator of  
990 calcineurin-2 is a centriolar protein with a role in cilia length control. *J. Cell Sci.*  
991 **131**, jcs212258.
- 992 **Sydor, A. M., Coyaud, E., Rovelli, C., Laurent, E., Liu, H., Raught, B. and Mennella,**  
993 **V.** (2018). PPP1R35 is a novel centrosomal protein that regulates centriole  
994 length in concert with the microcephaly protein RTTN. *Elife* **7**,.
- 995 **Szebenyi, G., Hall, B., Yu, R., Hashim, A. I. and Krämer, H.** (2007). Hook2 localizes  
996 to the centrosome, binds directly to centriolin/CEP110 and contributes to  
997 centrosomal function. *Traffic* **8**, 32–46.
- 998 **Teo, G., Liu, G., Zhang, J., Nesvizhskii, A. I., Gingras, A.-C. and Choi, H.** (2014).  
999 SAINTexpress: improvements and additional features in Significance Analysis of  
1000 INTeractome software. *J. Proteomics* **100**, 37–43.
- 1001 **Tomba, P., Davey, N. E., Gibson, T. J. and Babu, M. M.** (2014). A million peptide  
1002 motifs for the molecular biologist. *Mol. Cell* **55**, 161–169.
- 1003 **Tugendreich, S., Tomkiel, J., Earnshaw, W. and Hieter, P.** (1995). CDC27Hs  
1004 colocalizes with CDC16Hs to the centrosome and mitotic spindle and is essential  
1005 for the metaphase to anaphase transition. *Cell* **81**, 261–268.
- 1006 **Ulengin-Talkish, I., Parson, M. A. H., Jenkins, M. L., Roy, J., Shih, A. Z. L., St-**  
1007 **Denis, N., Gulyas, G., Balla, T., Gingras, A.-C., Várnai, P., et al.** (2021).  
1008 Palmitoylation targets the calcineurin phosphatase to the phosphatidylinositol 4-  
1009 kinase complex at the plasma membrane. *Nat. Commun.* **12**, 6064.
- 1010 **Veland, I. R., Awan, A., Pedersen, L. B., Yoder, B. K. and Christensen, S. T.** (2009).  
1011 Primary cilia and signaling pathways in mammalian development, health and  
1012 disease. *Nephron Physiol.* **111**, 39–53.

- 1013 **Wang, J. T. and Stearns, T.** (2017). The ABCs of centriole architecture: The form and  
1014 function of triplet microtubules. *Cold Spring Harb. Symp. Quant. Biol.* **82**, 145–  
1015 155.
- 1016 **Wang, J., Tucholska, M., Knight, J. D. R., Lambert, J.-P., Tate, S., Larsen, B.,**  
1017 **Gingras, A.-C. and Bandeira, N.** (2015). MSPLIT-DIA: sensitive peptide  
1018 identification for data-independent acquisition. *Nat. Methods* **12**, 1106–1108.
- 1019 **Weisz Hubshman, M., Broekman, S., van Wijk, E., Cremers, F., Abu-Diab, A.,**  
1020 **Khateb, S., Tzur, S., Lagovsky, I., Smirin-Yosef, P., Sharon, D., et al.** (2018).  
1021 Whole-exome sequencing reveals POC5 as a novel gene associated with  
1022 autosomal recessive retinitis pigmentosa. *Hum. Mol. Genet.* **27**, 614–624.
- 1023 **Wigington, C. P., Roy, J., Damle, N. P., Yadav, V. K., Blikstad, C., Resch, E., Wong,**  
1024 **C. J., Mackay, D. R., Wang, J. T., Krystkowiak, I., et al.** (2020). Systematic  
1025 discovery of short linear motifs decodes calcineurin phosphatase signaling. *Mol.*  
1026 *Cell* **79**, 342-358.e12.
- 1027 **Wong, R. W.** (2010). Interaction between Rae1 and cohesin subunit SMC1 is required  
1028 for proper spindle formation. *Cell Cycle* **9**, 198–200.
- 1029 **Zuo, X., Fogelgren, B. and Lipschutz, J. H.** (2011). The small GTPase Cdc42 is  
1030 necessary for primary ciliogenesis in renal tubular epithelial cells. *J. Biol. Chem.*  
1031 **286**, 22469–22477.

1032

## 1033 **Figure legends**

1034

1035 **Fig. 1. Temporal mapping of calcineurin-proximal proteins reveals centrosome**  
1036 **association.**

- 1037 A. Scheme for proximity-dependent biotin labeling using asynchronous or  
1038 synchronized cells expressing miniTurbo-3xFLAG alone or fused to CNA<sub>WT</sub> or  
1039 CNA<sub>NIRmut</sub>.
- 1040 B. Average spectral counts determined via DDA for preys labelled by CNA<sub>WT</sub> with  $\geq$   
1041 2 peptides and BFDR  $\leq$  0.01 in at least one condition. Bold: PxlIT-dependent  
1042 ( $\text{Log}_2 \text{CNA}_{\text{WT}}/\text{CNA}_{\text{NIRmut}} \geq 0.5$ ). Red: Preys from GO category “centrosome”.  
1043 Asterisks: preys with predicted CN-dependent SLiMs.
- 1044 C. Select statistically enriched GO cellular component categories shown for the 41  
1045 CN-proximal proteins. FDR, false discovery rate.

- 1046 D. Schematic showing locations CN-proximal proteins that localize to centrosomes,  
1047 cilia or mitotic spindles, details in Table S2.  
1048 E. Overlap of centrosome and cilia-associated CN-proximal proteins detected by  
1049 Wigington et al., 2020 (pink circle) or in this study (blue). Asterisks indicate  
1050 proteins with predicted CN-binding SLiMs.

1051

1052 **Fig. 2. CNB localizes to centrosomes.**

1053

- 1054 A. Centrosome associated CNB in cytosol-depleted hTERT-RPE1 cells determined by  
1055 indirect immunofluorescence. Representative images are maximum projections of  
1056 confocal z-stacks. Scale bar, 5  $\mu\text{m}$ . Bar chart shows the frequency of different  
1057 patterns (I, II or III).  
1058 B. Centrosomal localization of CNB in hTERT-RPE1 cells imaged with expansion  
1059 microscopy. Top: G1 centrosome. Bottom: S-phase centrosomes. Images are  
1060 obtained from a single z-plane. Scale bar, 1  $\mu\text{m}$ .

1061

1062 **Fig. 3. Calcineurin interacts with centriolar protein POC5 in a PxlIT-dependent**  
1063 **manner.**

1064

- 1065 A. Schematic of human POC5 showing predicted PxlIT motif (orange) and mutant  
1066 ADARAA. Green: centrin binding sequences. Blue circles: phosphorylated  
1067 residues reported in PhosphoSitePlus (Hornbeck et al., 2015).  
1068 B. POC5 contains a CN-binding PxlIT motif. Immunoblot of co-purification of GST-  
1069 tagged PxlIT peptides from NFATC1 and POC5 (WT or ADARAAmut) with  
1070 6xHis-MBP or CN.  
1071 C. Quantification of experiment in 3B, i.e., bound GST signal/bound His signal,  
1072 normalized to input GST. Data are mean  $\pm$  SEM (n = 4 independent  
1073 experiments). p-values determined by unpaired, two-tailed t-test.  
1074 D. CN associates with POC5 in a PxlIT-dependent manner *in vivo*: Immunoblot of  
1075 GFP- FLAG or -CNA co-immunoprecipitated with 6xmyc-tagged POC5<sub>WT</sub> or  
1076 POC5<sub>ADARAA</sub> expressed in HeLa cells.

- 1077 E. Quantification of experiment in Fig. 3D shown as bound GFP signal/bound myc  
1078 signal, normalized to input GFP. Data are mean  $\pm$  SEM (n = 4 independent  
1079 experiments). p-values determined by ratio-paired, two-tailed t-test.
- 1080 F. POC5 PxIxIT motif is not required for centriole localization. Immunofluorescence  
1081 of HeLa cells expressing 6xmyc-POC5, showing POC5 colocalization with  
1082 centrin. Images obtained from a single z-plane, so only one spindle pole may be  
1083 in focus in mitosis. The region of interest is magnified in inset. Scale bar, 5  $\mu$ m.
- 1084 G. Expansion microscopy of hTERT-RPE1 cells treated with DMSO or FK506 for 48  
1085 hours, showing POC5 in the centriole lumen and  $\gamma$ -tubulin in the lumen and PCM.  
1086 Images obtained from a single z-plane. Scale bar, 1  $\mu$ m.
- 1087 H. CN inhibition decreases luminal distribution of POC5. Median percent of centriole  
1088 covered by POC5  $\pm$  interquartile range (IQR).
- 1089 I. CN inhibition does not alter luminal distribution of  $\gamma$ -tubulin. Median percent of  
1090 centriole covered by  $\gamma$ -tubulin  $\pm$  IQR. For H, I: Pooled data from two independent  
1091 experiments, with 25-30 centrioles analyzed per condition per experiment are  
1092 shown. p-value > 0.05, determined by unpaired, two-tailed t-test.
- 1093 J. CN dephosphorylates mitotic POC5 *in vitro*. Representative immunoblot of *in*  
1094 *vitro* dephosphorylation of 6xmyc-POC5 by  $\lambda$  phosphatase or CN. Nocod, POC5-  
1095 expressing cells synchronized with nocodazole.  $\lambda$  PPase, lambda phosphatase.  
1096 CN PPase, purified CNA/CNB. PPIs, phosphatase inhibitors. P-POC5,  
1097 phosphorylated POC5. deP-POC5, dephosphorylated.
- 1098

1099 **Fig. 4. Calcineurin inhibition promotes cilia elongation.**

- 1100
- 1101 A. CN inhibition increases cilia length without disrupting ciliogenesis. Cilia of  
1102 IMCD3 cells at 0, 24 and 48 hours of treatment with DMSO or FK506. White  
1103 arrows in the left-most panel point to short cilia. Images are maximum  
1104 projections of confocal z-stacks. Scale bar, 10  $\mu$ m.
- 1105 B. Percentage of ciliated IMCD3 cells shown in Fig. 4A. Horizontal lines are mean  
1106  $\pm$  SEM (n = 3 independent experiments). Number of cells analyzed: 0 hrs:  
1107 n=1319, 24 hrs DMSO: n=2176, 24 hrs FK506: n=2468, 48 hrs DMSO: n=3710,

- 1108 48 hrs FK506: n=4120. p-values > 0.05, determined by unpaired, two-tailed t-  
1109 test.
- 1110 C. Length of cilia shown in Fig. 4A. Boxplots: median length  $\pm$  IQR. Whiskers:  
1111 median  $\pm$  1.5 x IQR. Data pooled from 3 independent experiments. Cilia  
1112 measured: 0 hrs: n=331, 24 hrs DMSO: n=556, 24 hrs FK506: n=256, 48 hrs  
1113 DMSO: n=931, 48 hrs FK506: n=429. p-values determined by two-tailed Mann-  
1114 Whitney test.
- 1115 D. Forskolin and CN inhibitors increase cilia length without altering cilia number.  
1116 Cilia of IMCD3 cells treated with DMSO, forskolin, or CNIs for 3 hours. Images  
1117 are maximum projections of confocal z-stacks. Scale bar, 10  $\mu$ m.
- 1118 E. Length of cilia shown in Fig. 4D. Data shown for one of four replicates;  
1119 Additional replicates, Fig. 4SA. Cilia measured: DMSO: n=537, forskolin: n=514,  
1120 cyclosporin A: n=553, FK506: n=638. p-values determined by two-tailed Mann-  
1121 Whitney test.
- 1122 F. Percentage of ciliated IMCD3 cells shown in Fig 4D. Mean  $\pm$  SEM shown (n = 4  
1123 independent experiments). >1200 cells analyzed per replicate per treatment. p-  
1124 values > 0.05 determined by unpaired, two-tailed t-test.

1125

1126 **Fig. S1 (Related to Figure 1). Proximity-labelled cells showed equal levels of**  
1127 **miniTurbo bait expression, proper cell cycle synchronization and resulted in**  
1128 **preys known to associate with one another.**

1129

- 1130 A. Induction of miniTurbo-CNA $\alpha$  overexpression does not disrupt cell cycle  
1131 progression. HEK293 Flp-In T-Rex with inducible miniTurbo-CNA $\alpha$ <sub>WT</sub>  
1132 expression were either treated with 0  $\mu$ g/mL doxycycline (control-blue boxes) or  
1133 1  $\mu$ g/mL doxycycline (doxycycline-yellow boxes) for 48 hours. On the second  
1134 day of doxycycline induction, cells were also treated with DMSO  
1135 (asynchronous) or 9  $\mu$ M RO-3306 for 20 hours and then released from arrest.  
1136 At various time points post RO-3306 washout, cells were fixed, stained with 20  
1137  $\mu$ g/mL DAPI and analyzed by flow cytometry. Cell cycle profiles post-release  
1138 were similar between the control and doxycycline groups.

- 1139 B. Protein expression in asynchronous and G1/S miniTurbo samples. HEK293  
1140 Flp-In T-Rex cells with induced expression of miniTurbo fusions were  
1141 synchronized and labelled with biotin. Immunoblot contains samples from two  
1142 independent experimental replicates. Anti-FLAG staining was used to ensure  
1143 expression of the miniTurbo baits, anti-cyclin A2 as a cell cycle marker and  
1144 anti-actin beta as a loading control. Rep, replicate. Rel. amount of cyclin A2  
1145 norm. to actin: relative ratio of cyclin A2 band signal normalized by the  
1146 corresponding actin band signal.
- 1147 C. Protein expression in asynchronous and mitotic miniTurbo samples. HEK293  
1148 Flp-In T-Rex cells with induced expression of miniTurbo fusions were  
1149 synchronized and labelled with biotin. Immunoblot contains samples from two  
1150 independent experimental replicates. Anti-FLAG staining was used to ensure  
1151 expression of the miniTurbo baits, anti-Ser10 phosphorylated histone H3 as a  
1152 mitotic marker and anti-actin beta as a loading control. Rep, replicate. Rel.  
1153 amount of pHistone H3 norm. to actin: relative ratio of phosphorylated histone  
1154 H3 band signal normalized by the corresponding actin band signal.
- 1155 D. Cell cycle profiles of synchronized miniTurbo HEK293 Flp-In T-Rex cells prior  
1156 to mass spectrometry analysis. Profiles shown are from one of the two  
1157 independent replicates of the proximity labeling experiment and were obtained  
1158 by flow cytometry using DAPI staining.
- 1159 E. Brightfield microscopy images showing miniTurbo cell samples synchronized in  
1160 mitosis 1 hour after RO-3306 washout. Insets show that cells are rounded up  
1161 and their chromosomes are aligned on the metaphase plate, indicating that  
1162 they are mitotic. Scale bar, 100  $\mu\text{m}$ , inset scale bar, 10  $\mu\text{m}$ .
- 1163 F. Heat map of average spectral counts for preys labelled by miniTurbo-CNA<sub>WT</sub> or  
1164 CNA<sub>NIRmut</sub> in asynchronous, G1/S and mitotic cells. Only preys labelled by  
1165 CNA<sub>WT</sub> with unique peptides  $\geq 2$  and bayesian false discovery rate (BFDR)  $\leq$   
1166 0.01 in at least one treatment are included. Spectral counts were obtained via  
1167 data-independent mixture-spectrum partitioning using libraries of identified  
1168 tandem mass spectra (DIA/mSPLIT). Bold: preys with PxlIT-dependent  
1169 biotinylation ( $\text{Log}_2 \text{CNA}_{\text{WT}}/\text{CNA}_{\text{NIRmut}} \geq 0.5$ ). Red: proteins annotated with the

1170 Gene Ontology (GO) term “centrosome”. Asterisks: proteins with predicted CN-  
1171 dependent SLiMs (PxlIT or LxVP) identified *in silico* (Wigington et al., 2020).  
1172 AvgSpec, average spectral counts. Exact spectral counts can be found under  
1173 “mSPLIT filtered dataset” on Table S1.

1174 G. STRING database v11.5 (string-db.org) network of protein-protein interactions  
1175 between CN-proximal proteins identified in this study (38 from DDA analysis  
1176 and 3 additional from mSPLIT analysis). Proteins without any known interactors  
1177 within the network were omitted. Line intensity is proportional to the confidence  
1178 of the interaction. PPI enrichment p-value: 4.02e-05. Number of edges: 19.  
1179 Expected number of edges: 6.

1180

1181 **Fig. S2 (Related to Figure 2) CNB antibody blocking demonstrates that**  
1182 **centrosomal localization of CNB is highly specific.**

1183

1184 A. Nitrocellulose membrane stained with Ponceau S, showing analysis of purified  
1185 BSA and purified truncated CNA and CNB by SDS-PAGE. Dotted lines  
1186 indicate pieces of the membrane that were excised and incubated with anti-  
1187 CNB antibody for antibody blocking in Fig. S2B.

1188 B. Pre-incubating anti-CNB antibody with purified CNB eliminates centrosomal  
1189 localization. Immunofluorescence of cytosol depleted hTERT-RPE1 cells.  
1190 Centrioles are marked by anti-POC5 staining (green) and nuclei are marked by  
1191 DAPI (blue). CNB localization (red) is analyzed by staining cells with anti-CNB  
1192 antibody that has been pre-incubated with purified proteins transferred onto a  
1193 nitrocellulose membrane as shown in Fig. S2A. In the top panels, anti-CNB  
1194 antibody was incubated with bovine serum albumin (BSA) in two independent  
1195 experiments. In the bottom panels, anti-CNB antibody was incubated with CNB  
1196 in two independent experiments. Lines were drawn across the two centrioles  
1197 of each cell (shown in yellow) to generate line intensity plots on the right of  
1198 each immunofluorescence panel. Line intensity plots track the intensity of CNB  
1199 signal (red) and POC5 signal (green) across the cell and the two centrioles,  
1200 indicated by the double peaks of POC5 intensity. Scale bar, 5  $\mu$ m.

1201  
1202  
1203  
1204  
1205  
1206  
1207  
1208  
1209  
1210  
1211  
1212  
1213  
1214  
1215  
1216  
1217  
1218  
1219  
1220  
1221  
1222  
1223  
1224  
1225  
1226  
1227  
1228  
1229  
1230

**Fig. S3 (Related to Figure 3) Calcineurin activity disrupts POC5 distribution, but does not alter  $\gamma$ -tubulin distribution or POC5 phospho-status *in vivo*.**

- A. Expansion microscopy of S-phase and G2 hTERT-RPE1 cells treated with DMSO or FK506 for 48 hours, showing POC5 in the centriole lumen and  $\gamma$ -tubulin in the lumen and PCM. Images obtained from a single z-plane. Scale bar, 1  $\mu$ m.
- B. POC5 is phosphorylated in mitosis independently of CN stimulation or inhibition. Immunoblot showing lysates of HeLa cells transfected with 6xmyc-POC5 or -POC5<sub>ADARAA</sub>. Cells were treated with DMSO (-) or 100 ng nocodazole (+) for 18 hours and then incubated for one additional hour in 37°C after drug washout. The second POC5 band that appears in nocodazole (+) samples corresponds to p-POC5. For CN activation, samples were additionally treated with 1  $\mu$ M ionomycin + 1 mM CaCl<sub>2</sub> for one hour prior to cell lysis. For CN inhibition, samples were treated with 2.5  $\mu$ M FK506 for one hour followed by 2.5  $\mu$ M FK506 + 1  $\mu$ M ionomycin + 1 mM CaCl<sub>2</sub> for one more hour prior to cell lysis. Iono, ionomycin. Ca<sup>2+</sup>, calcium ions from CaCl<sub>2</sub> addition. Anti-actin-beta was used as a loading control.
- C. POC5 is hyperphosphorylated at centrosomes independently of CN stimulation or inhibition. Cytosolic and nuclear-centrosomal fractions prepared via sucrose fractionation from HeLa cells transfected with 6xmyc-POC5 or -POC5<sub>ADARAA</sub>. For CN activation, samples were treated with 1  $\mu$ M ionomycin + 1 mM CaCl<sub>2</sub> for one hour prior to fractionation. For CN inhibition, samples were treated with 2.5  $\mu$ M FK506 for one hour followed by 2.5  $\mu$ M FK506 + 1  $\mu$ M ionomycin + 1 mM CaCl<sub>2</sub> for one more hour prior to fractionation. Iono, ionomycin. Ca<sup>2+</sup>, calcium ions from CaCl<sub>2</sub> addition. Anti-GAPDH was used a cytosolic marker, anti-centrin2 as a centrosomal marker and anti-histone H3 as a nuclear marker.



1231 **Fig. S4 (Related to Figure 4) Calcineurin inhibition increases cilia length.**

1232

1233 A. Forskolin treatment and CN inhibition consistently promote cilia elongation.  
1234 Cilia length in ciliated IMCD3 cells treated for 3 hours with DMSO, forskolin,  
1235 cyclosporin A or FK506 as in Fig. 4A. Graphs show data from three  
1236 independent experimental replicates in addition to the replicate shown in 4B.  
1237 Cilia length was determined by 3D vector analysis of confocal z-stacks using  
1238 CiliaQ with CANNY 3D segmentation (Hansen et al., 2021). Only continuous  
1239 Arl13b branches with length > 1  $\mu\text{m}$  are shown on the graph. Number of cilia  
1240 measured: leftmost graph, DMSO, n=475, forskolin, n=564, cyclosporin A,  
1241 n=481, FK506, n=718. Center graph, DMSO, n=497, forskolin, n=602,  
1242 cyclosporin A, n=603, FK506, n=494. Rightmost graph, DMSO, n=371,  
1243 forskolin, n=417, cyclosporin A, n=421, FK506, n=470. Boxplots show  
1244 median length  $\pm$  interquartile range (IQR) and whiskers represent the median  
1245  $\pm$  1.5 x IQR. n.s., not significant, \*p<0.05, \*\*p<0.01, \*\*\*p<0.001. P-values  
1246 are indicated on each graph, using two-tailed Mann-Whitney test.

1247

1248 **Table S1. Dataset of proteins identified via PDB-MS, final filtered dataset and**  
1249 **associated GO term analyses.**

1250

1251 MiniTurbo-MS data-dependent acquisition (DDA) dataset analyzed by SAINTexp3.6.1  
1252 and data-independent mixture-spectrum partitioning using libraries of identified tandem  
1253 mass spectra (mSPLIT) dataset analyzed by SAINTexp3.6.3, filtered DDA dataset and  
1254 associated GO Term analyses.

1255

1256 **Table S2. Subcellular localization of centrosome-associated, calcineurin-proximal**  
1257 **proteins.**

1258

1259 Table of relevant literature regarding cilia and centrosome components that were  
1260 proximal to miniTurbo-CN in our study. Proteins are identified by their corresponding

1261 gene name, with a brief summary of their precise subcellular location as described by  
1262 the referenced studies.

1263

1264

## Figure 1. Temporal mapping of calcineurin-proximal proteins reveals centrosome association.

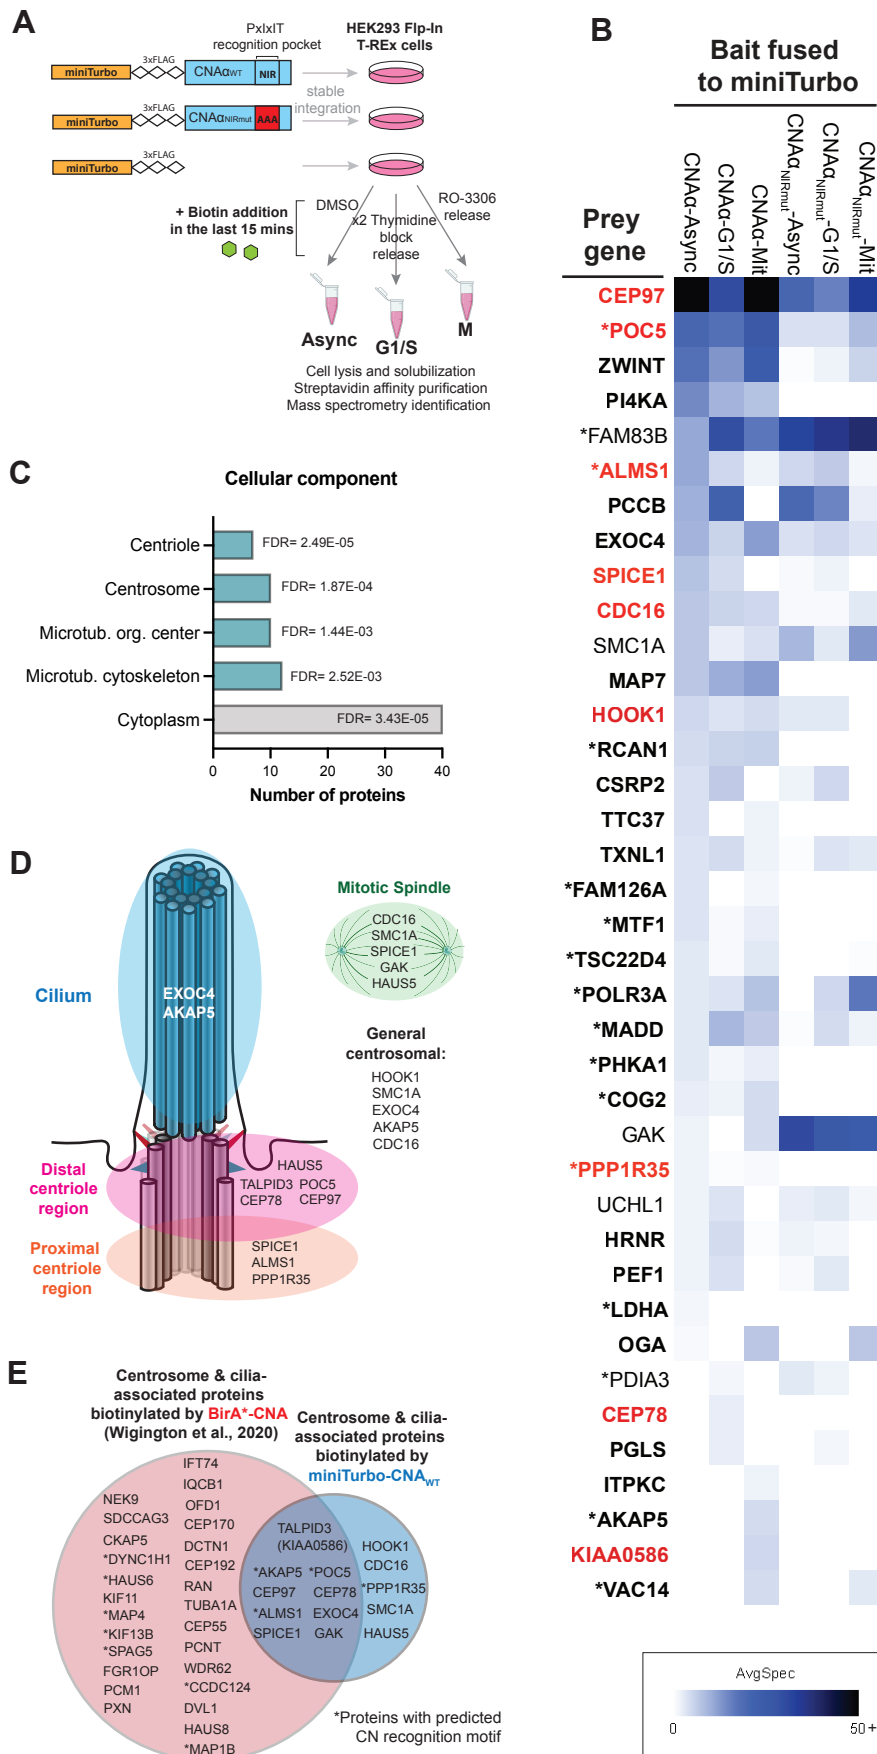

## Figure 2. CNB localizes to centrosomes.

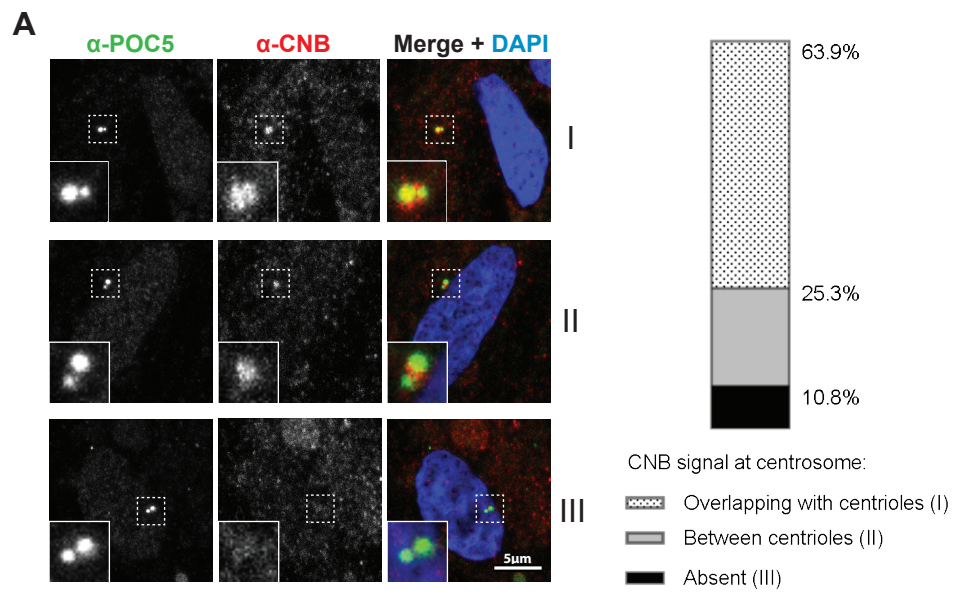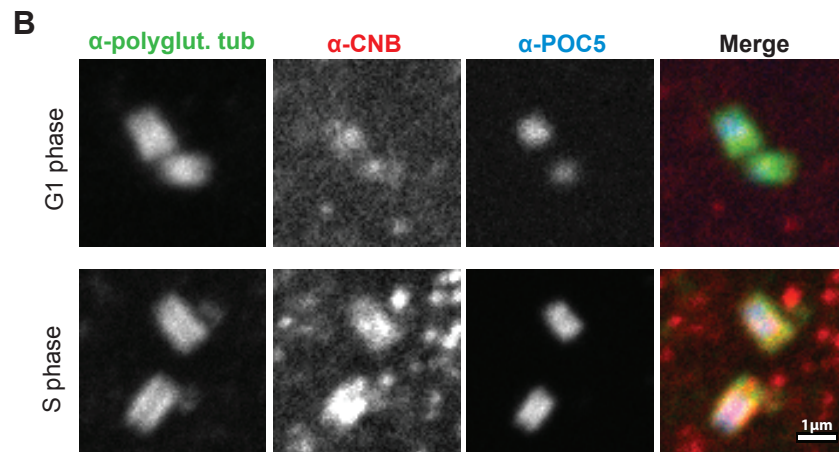

**Figure 3. Calcineurin interacts with centrin protein POC5 in a Pxl1T-dependent manner.**

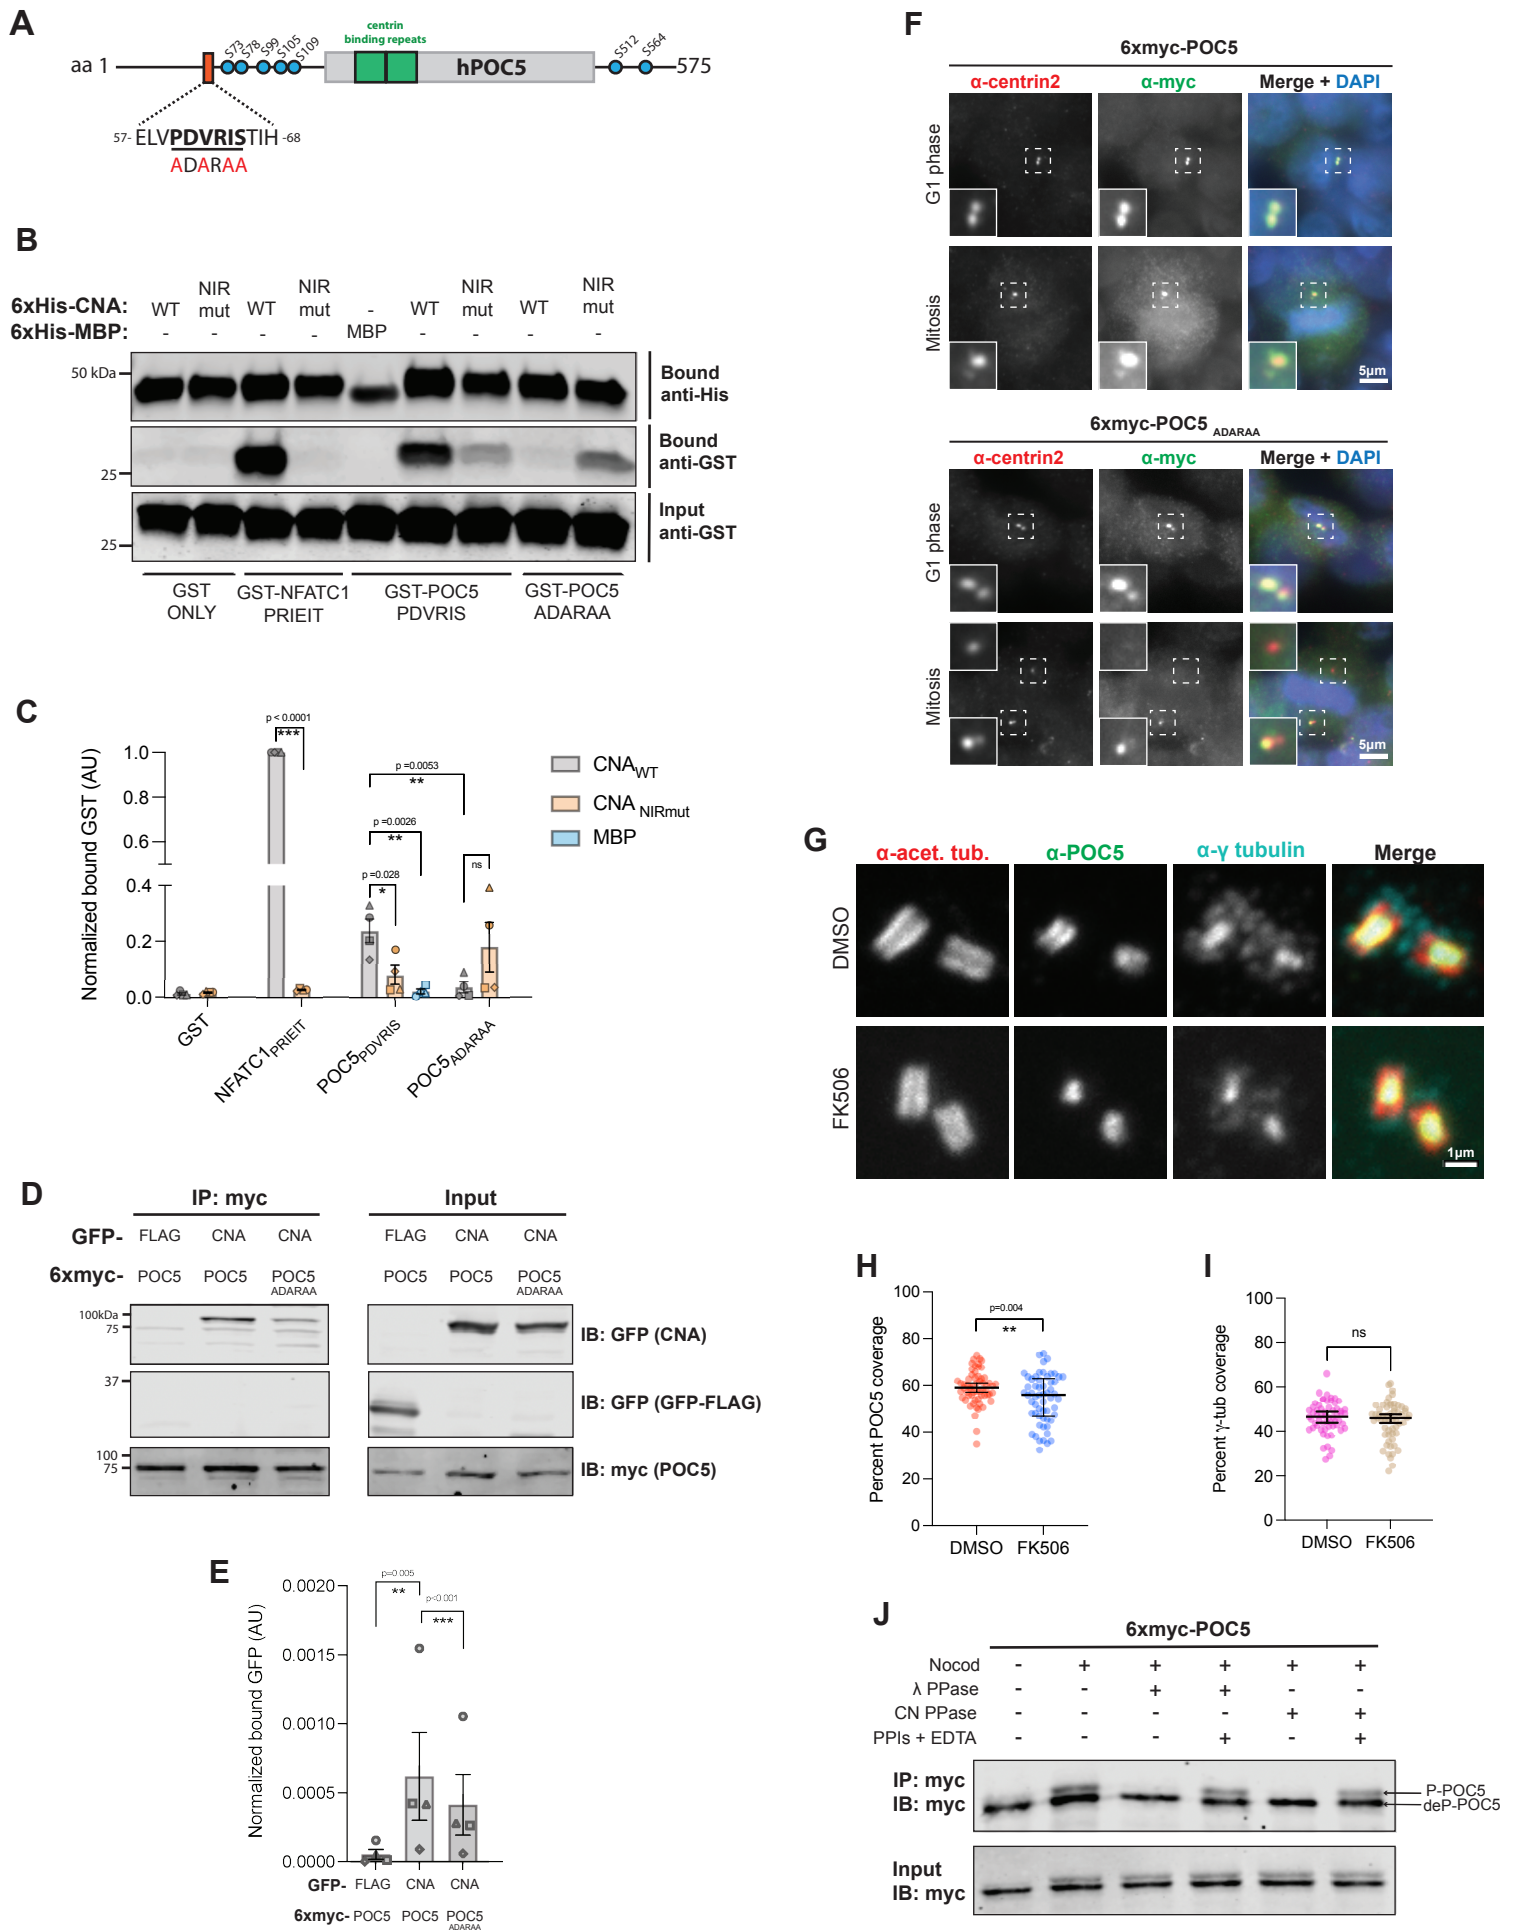

**Figure 4. Calcineurin inhibition promotes cilia elongation.**

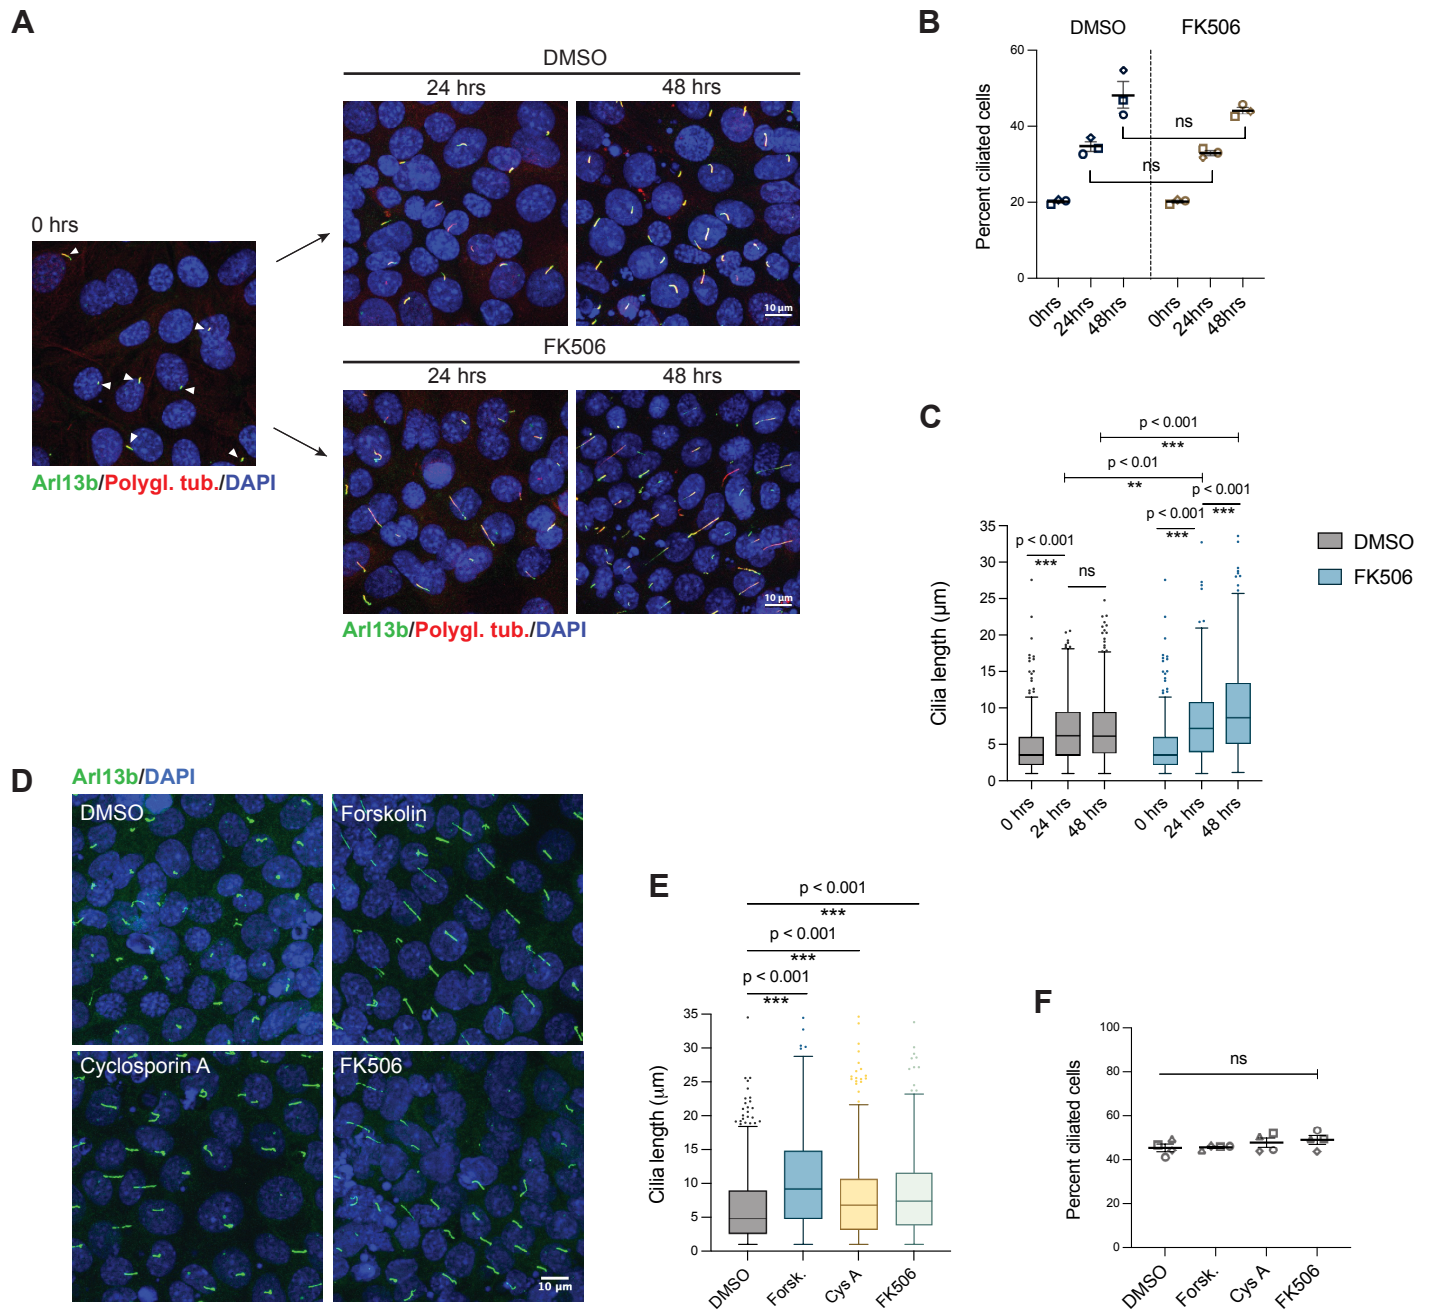

**Supplemental figure 1 Proximity labeled cells showed equal levels of miniTurbo bait expression, proper cell cycle synchronization and resulted in preys known to associate with one another.**

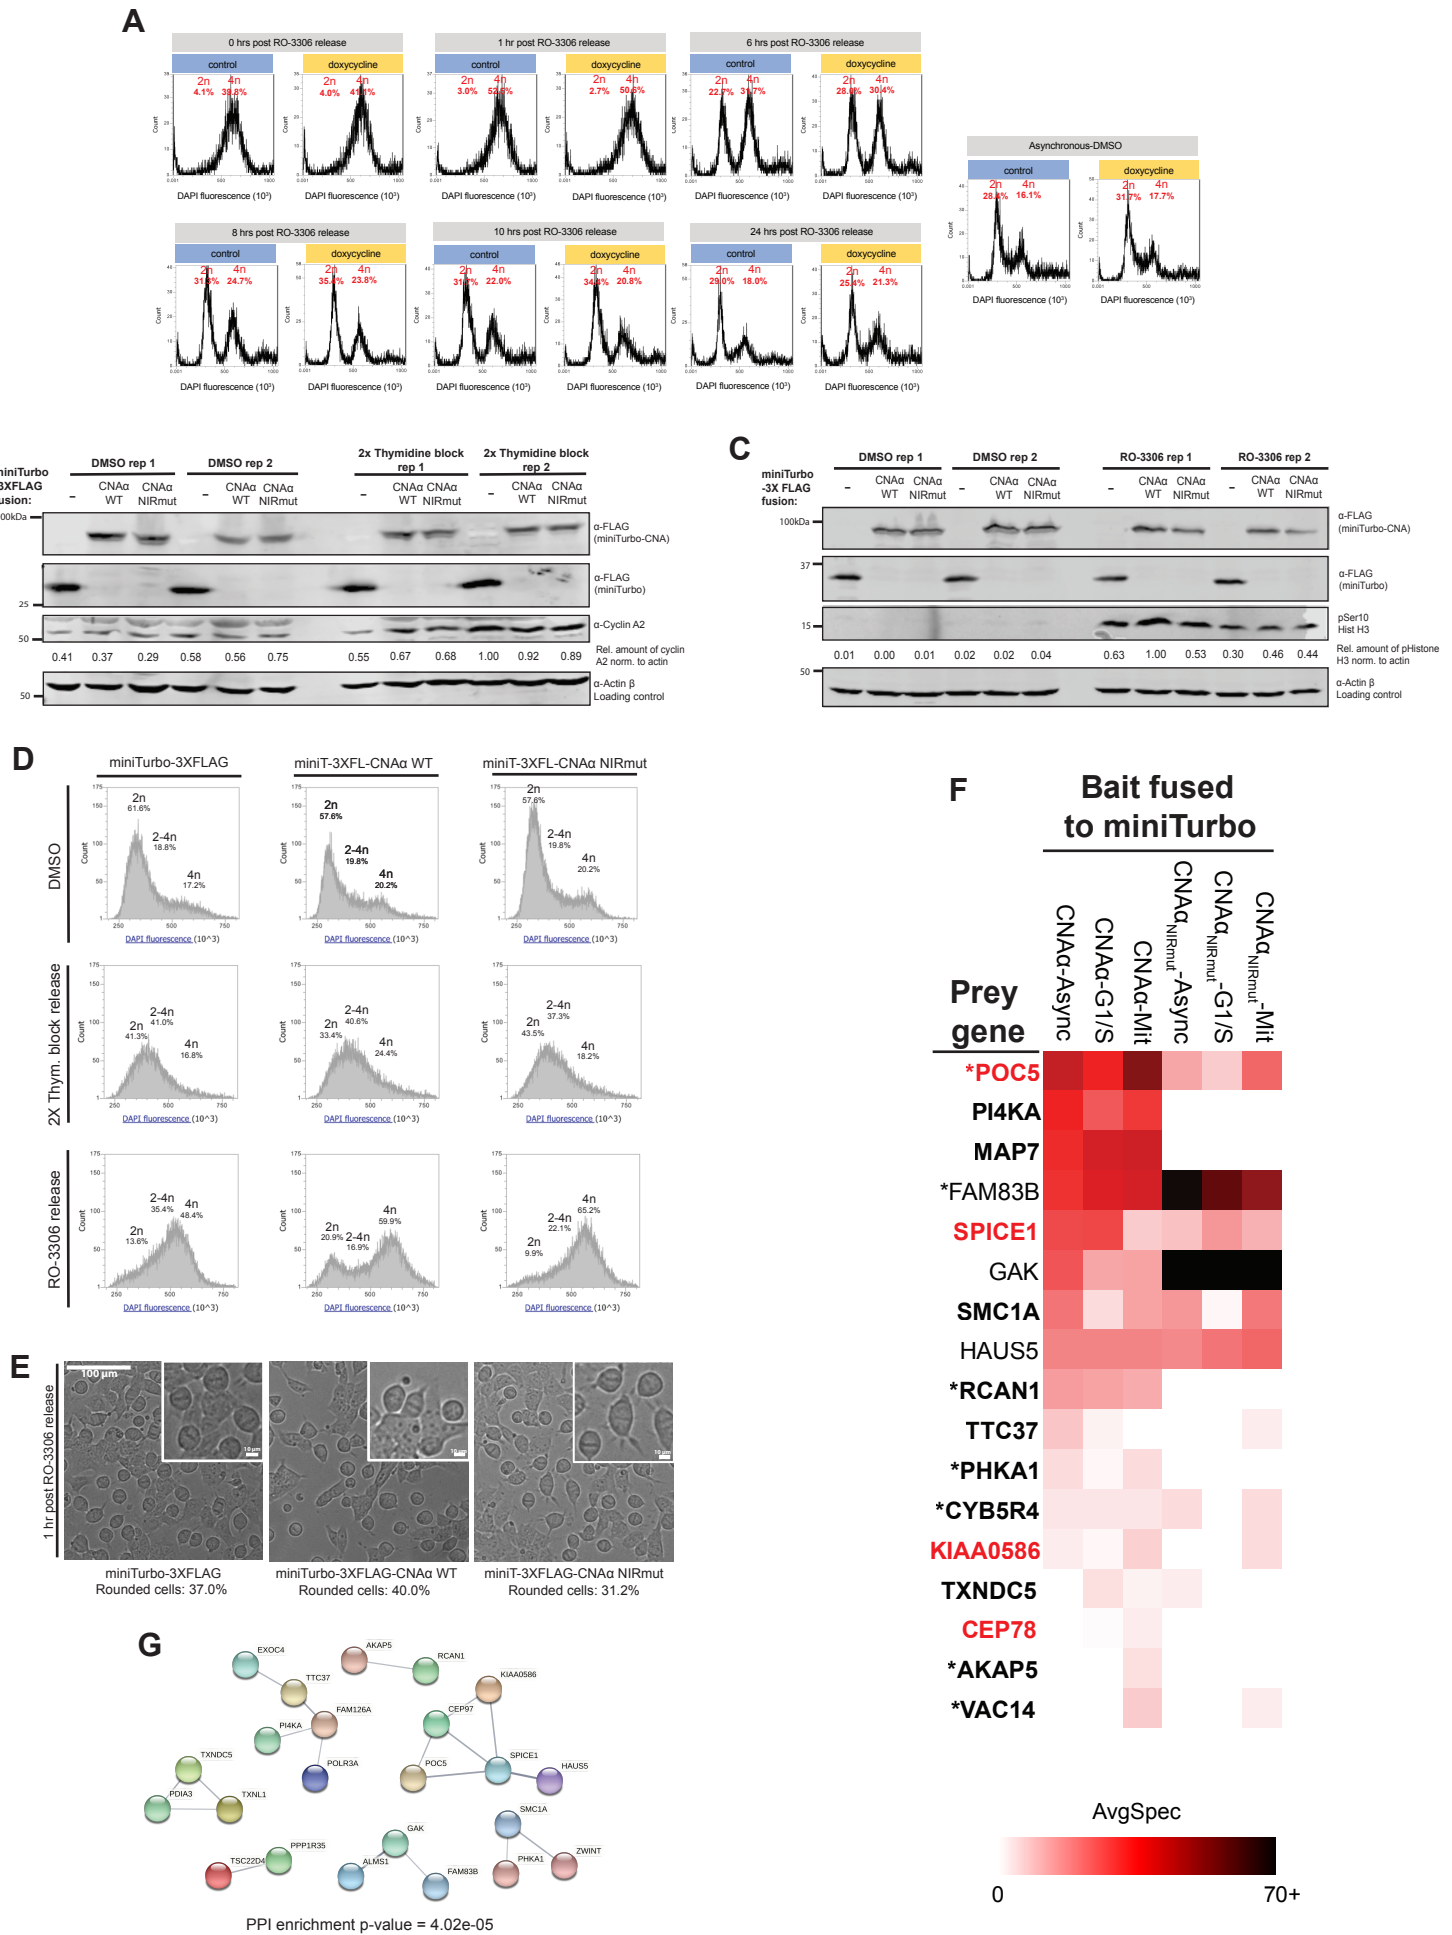

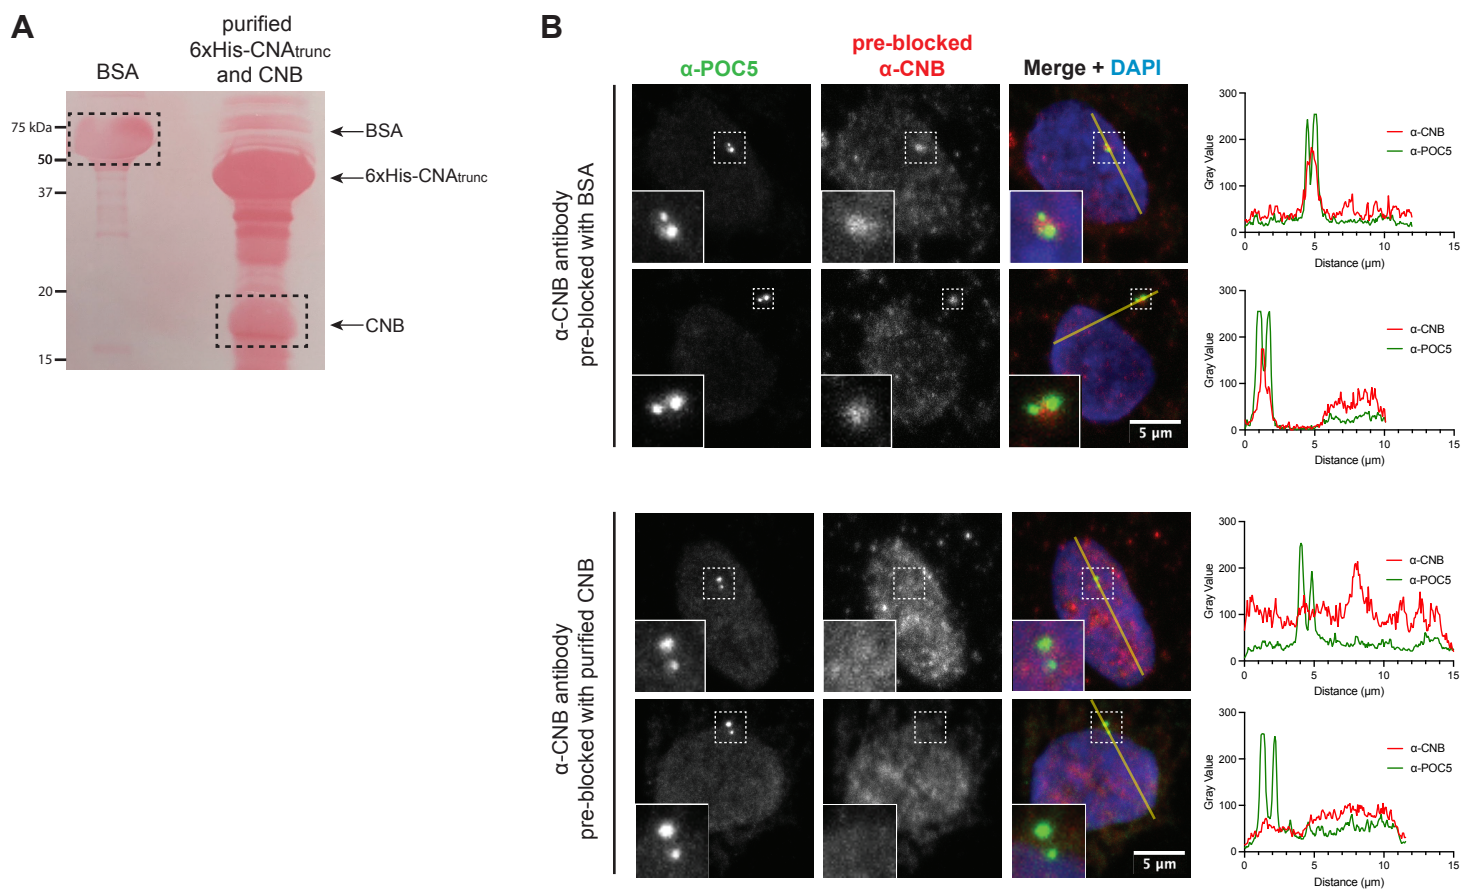



## Supplemental figure 3. Calcineurin activity disrupts POC5 distribution, but does not alter $\gamma$ -tubulin distribution or POC5 phospho-status *in vivo*.

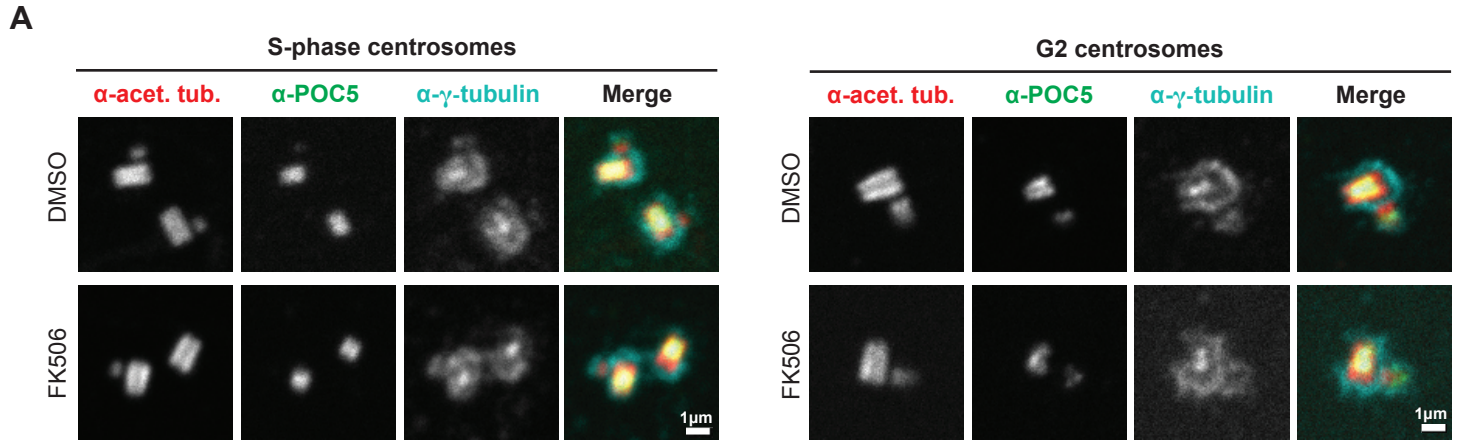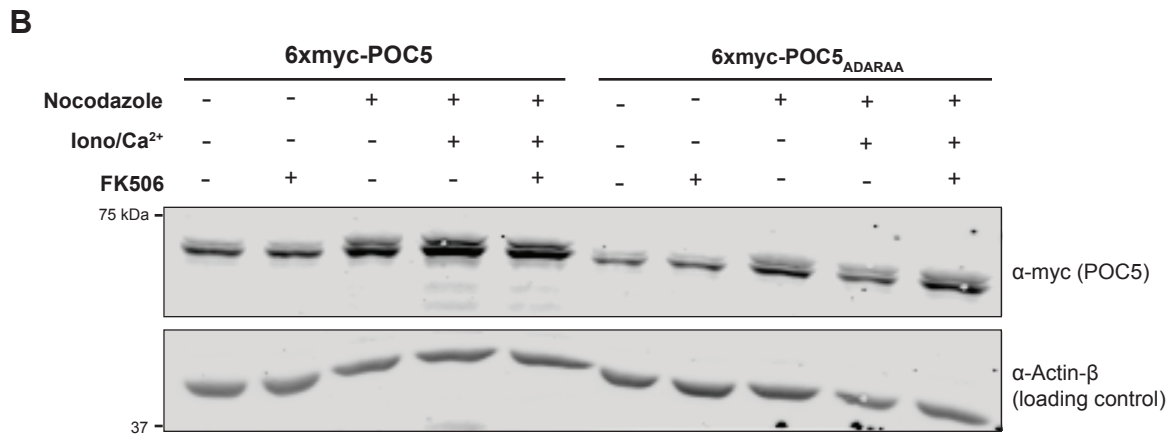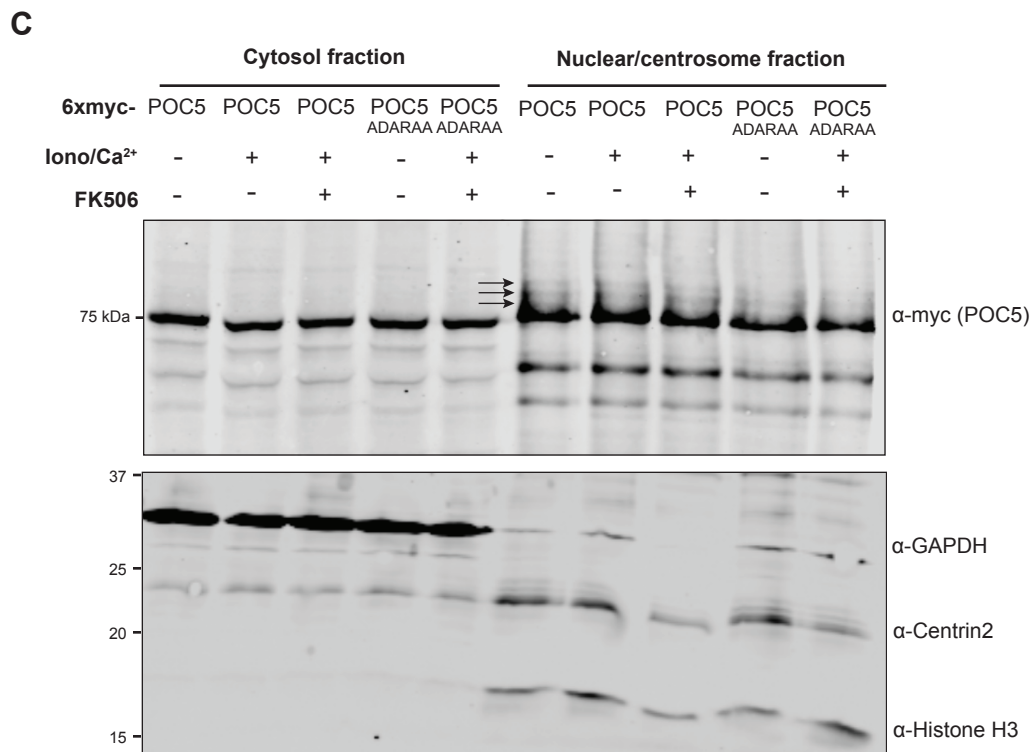

## Supplemental figure 4. Calcineurin inhibition increases cilia length.

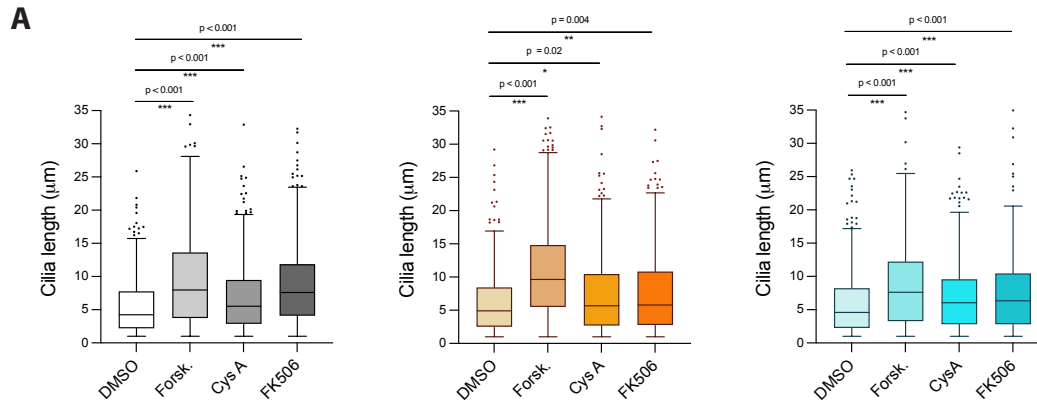

1265 **Table S2. Subcellular localization of centrosome-associated, calcineurin-**  
1266 **proximal proteins.**  
1267

| <b>Gene name</b>        | <b>Protein localization</b>                                                          | <b>References</b>                            |
|-------------------------|--------------------------------------------------------------------------------------|----------------------------------------------|
| AKAP5 (AKAP79, AKAP150) | Cilia, centrosomes, spindle poles                                                    | (Choi et al., 2011)                          |
| ALMS1                   | Proximal centrioles                                                                  | (Knorz et al., 2010)                         |
| CDC16                   | Centrosomes and spindle poles                                                        | (Tugendreich et al., 1995)                   |
| CEP78                   | Distal centrioles                                                                    | (Hossain et al., 2017)                       |
| CEP97                   | Distal centrioles                                                                    | (Spektor et al., 2007)                       |
| EXOC4 (SEC8)            | Cilia, centrosomes                                                                   | (Gupta et al., 2015; Zuo et al., 2011)       |
| GAK                     | Spindle poles during mitosis                                                         | (Fukushima et al., 2017; Naito et al., 2012) |
| HAUS5                   | Centrosomes in interphase, mitotic spindle microtubules, middle to distal centrioles | (Lawo et al., 2009; Schweizer et al., 2021)  |
| HOOK1                   | Broad distribution around centrosomes                                                | (Szebenyi et al., 2007)                      |
| POC5                    | Middle to distal centrioles                                                          | (Le Guennec et al., 2020)                    |
| PPP1R35                 | Proximal centrioles                                                                  | (Sydor et al., 2018)                         |
| SMC1A                   | Centrioles, spindle poles                                                            | (Guan et al., 2008; Wong, 2010)              |
| SPICE1                  | Proximal centrioles (distal to SAS-6, proximal to centrin)                           | (Comartin et al., 2013)                      |
| TALPID3 (KIAA0586)      | Distal centrioles                                                                    | (Kobayashi et al., 2014)                     |

1268
